# Supplementary material for: Spread of Highly Pathogenic Avian Influenza (HPAI) H5N5 Viruses in Europe in 2016–2017 Appears Related to the Timing of Reassortment Events
Source: MDPI journal article supplement (doi:10.3390/v11060501), 2019-05-31

**Figure S3. Maximum clade credibility trees.** Maximum clade credibility (MCC) trees were generated to estimate the median time to the most recent common ancestor (TMRCA) for each gene segment of highly pathogenic avian influenza (HPAI) H5N5 viruses isolated during the HPAI H5 2016-2017 epizootic. The H5N5 virus sequences are coloured according to their genotype (H5N5-GT1, red; H5N5-GT2, dark blue; H5N5-GT3, light blue). The median TMRCAs estimates were determined for H5N5-GT2 viruses (node 1), European H5N5-GT2 viruses (node 2), and H5N5-GT3 viruses (node 3). The estimated TMRCAs, the 95% highest posterior density (HPD) intervals and posterior values for each of the numbered nodes are listed in Table 2. PB2, polymerase basic 2; PB1, polymerase basic 1; PA, polymerase acidic; HA, hemagglutinin; NP, nucleoprotein; NA, neuraminidase; MP, matrix protein; NS, nonstructural protein.

# PB2

- H5N5-GT1
- H5N5-GT2
- H5N5-GT3

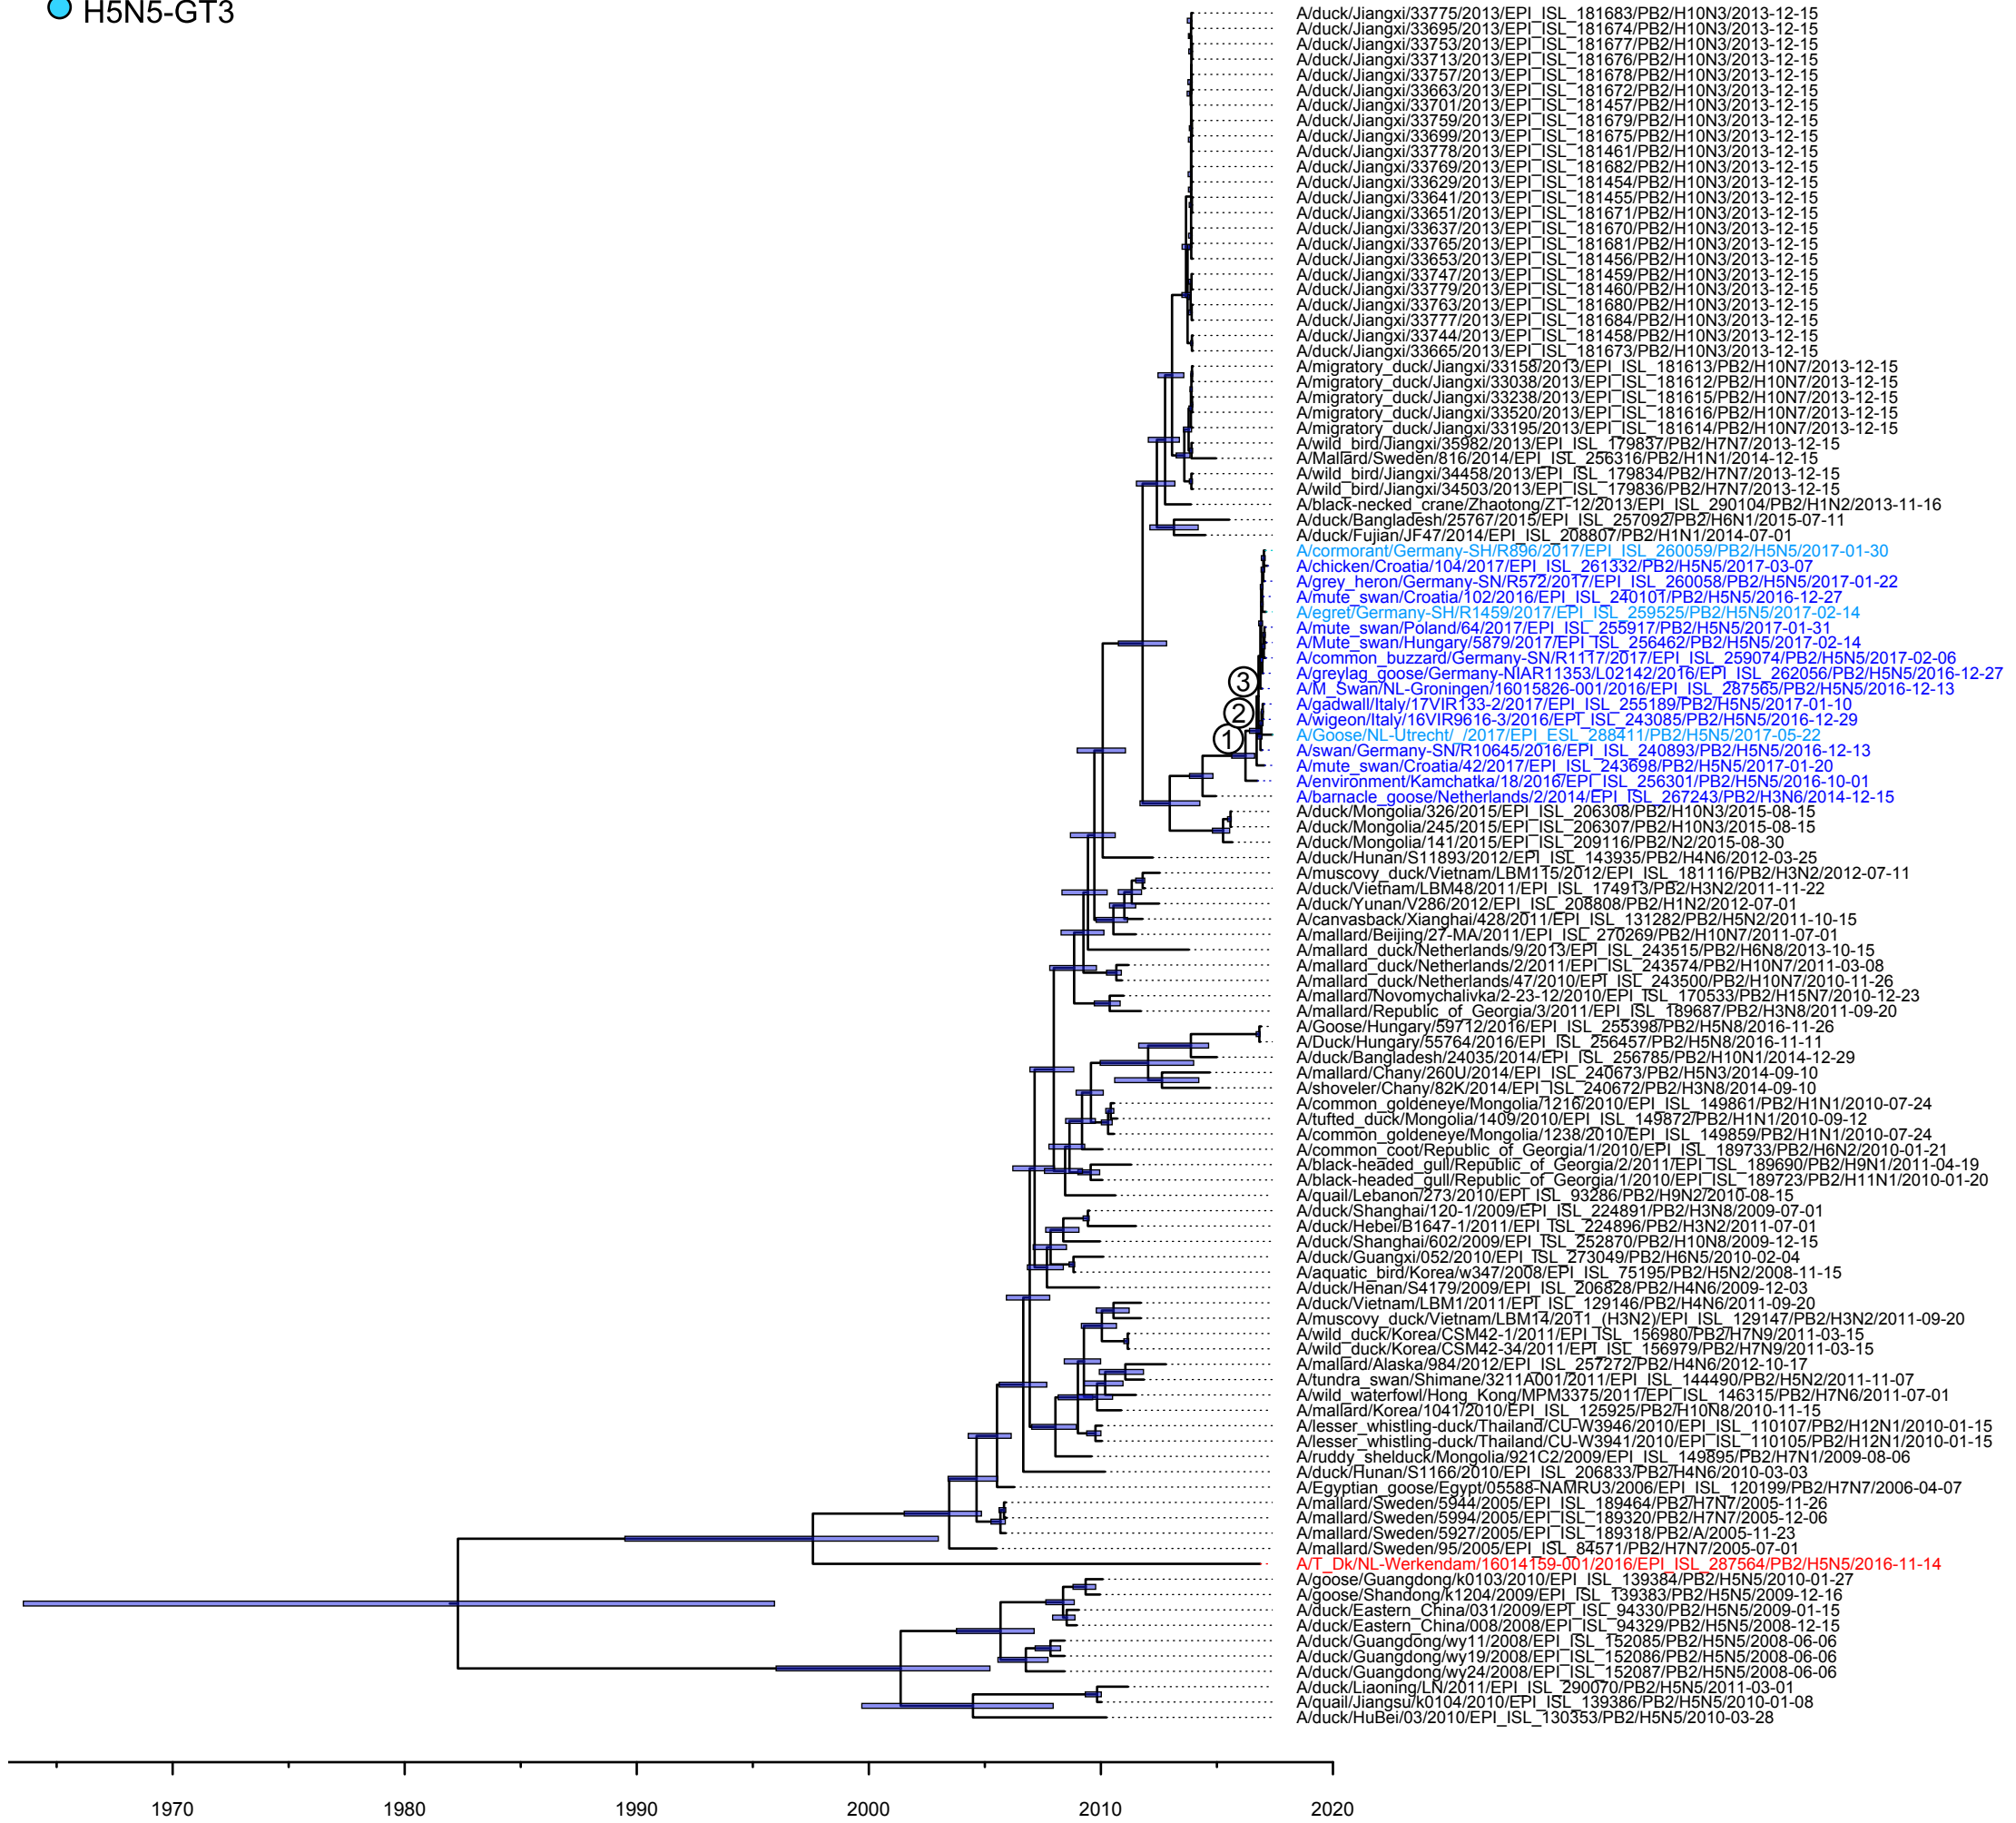

# PB1 H5N5-GT2

- H5N5-GT1
- H5N5-GT2
- H5N5-GT3

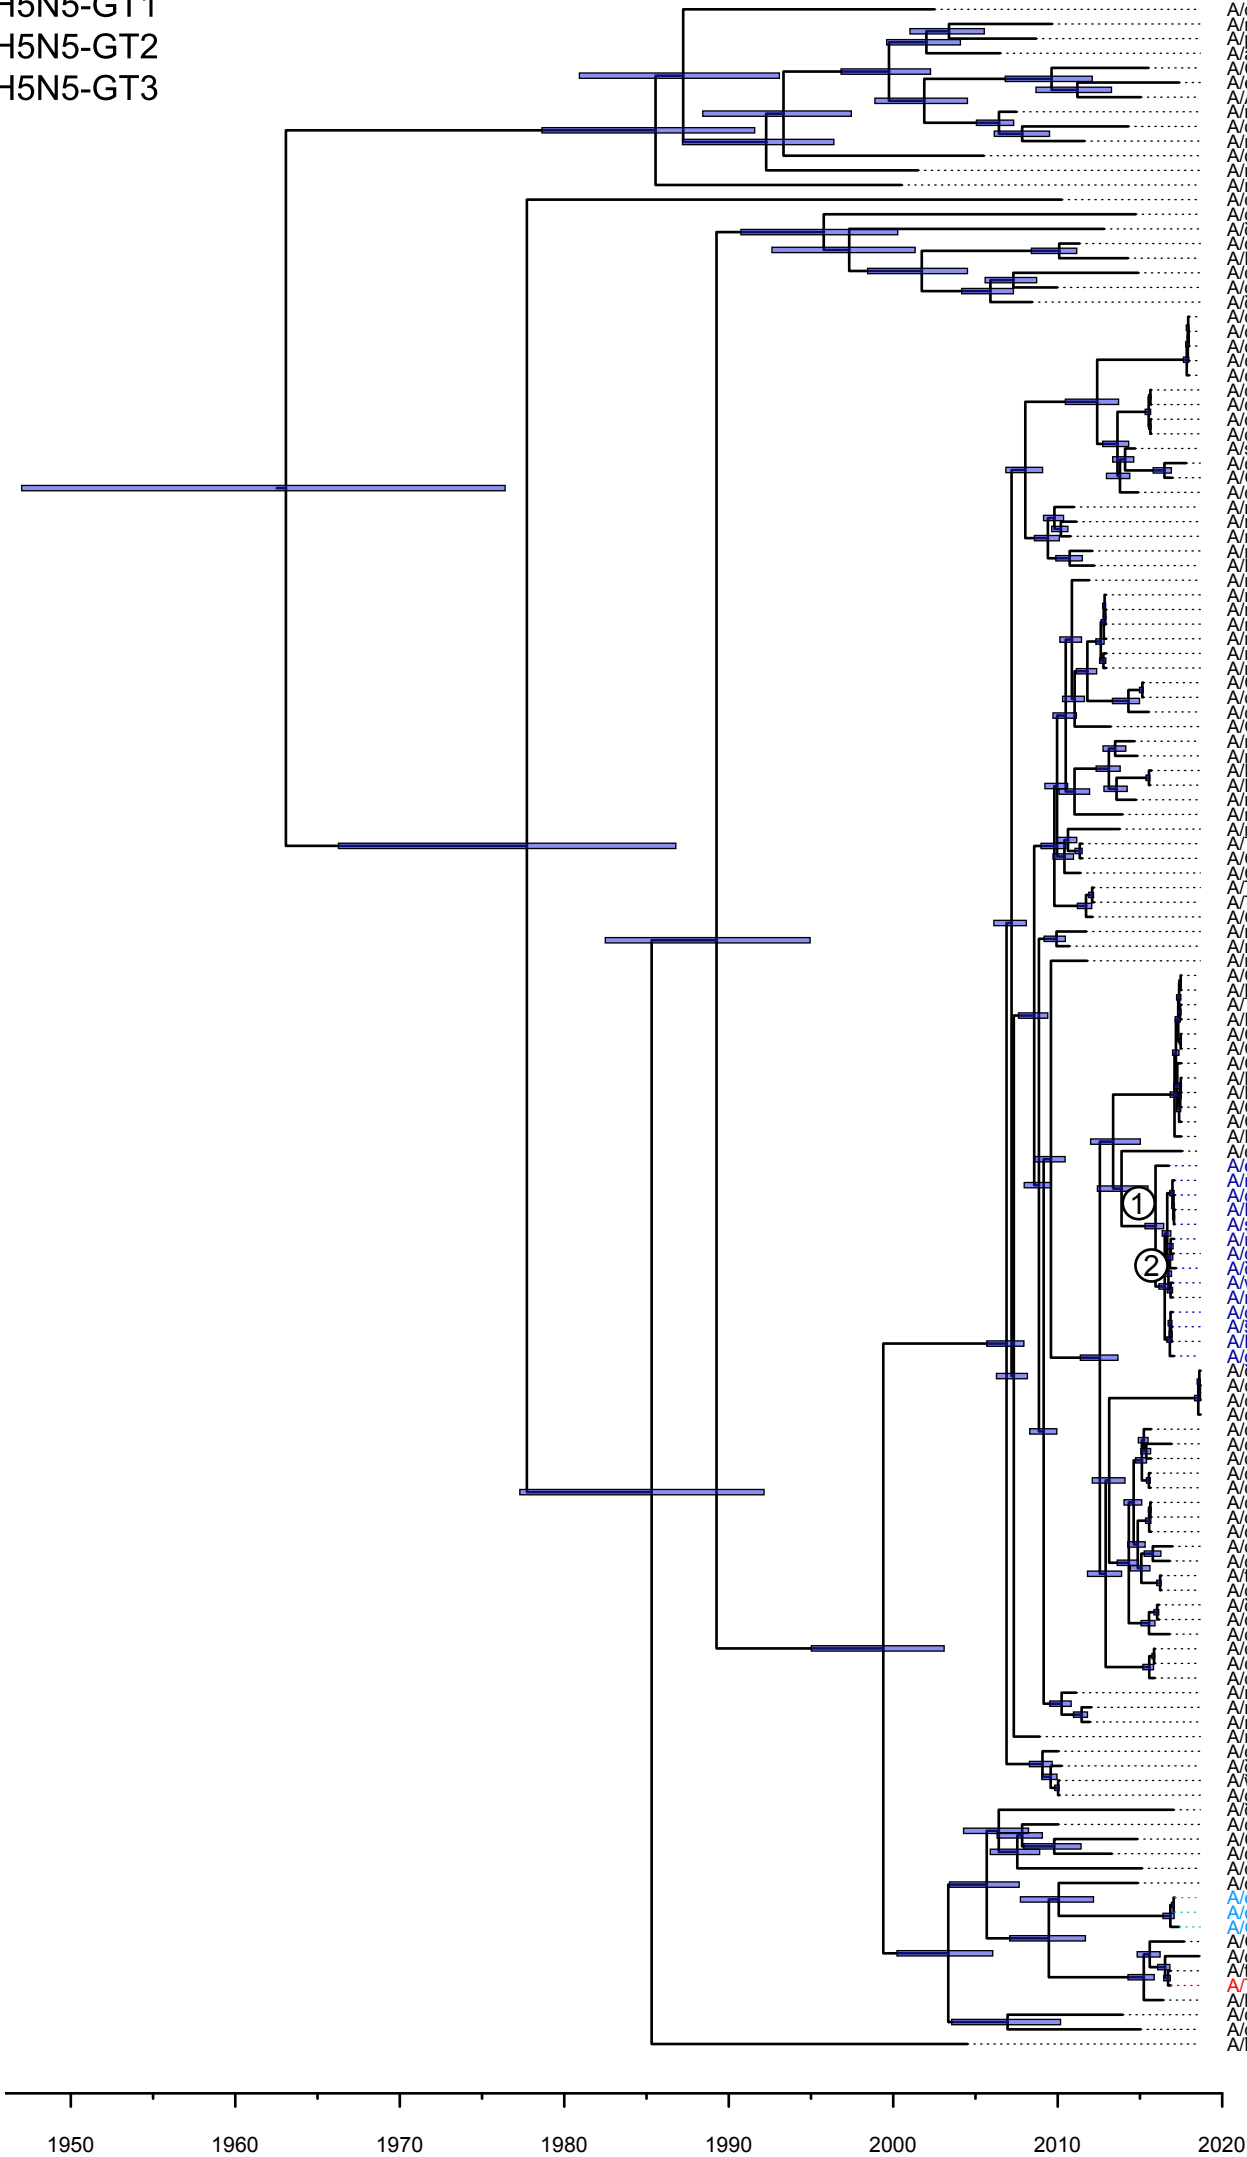

A/duck/NY/191255-59/02/EPI\_ISL\_3488/PB1/H5N8/2002-07-01  
A/mallard/Alberta/383/2009/EPI\_ISL\_278197/PB1/H5N5/2009-08-22  
A/cheasant/Iaho/08-002890-63/2008/EPI\_ISL\_328436/PB1/H5N6/2008-09-03  
A/avian/Colorado/456648/2006/EPI\_ISL\_79750/PB1/H5N8/2006-07-01  
A/chinstrap\_penguin/Antarctica/15459/2015/EPI\_ISL\_224756/PB1/H5N5/2015-07-01  
A/environment/New\_Jersey/UGA17-2155/2017/EPI\_ISL\_307668/PB1/H5N8/2017-05-14  
A/American\_wigeon/California/UCD58P/2015/EPI\_ISL\_255012/PB1/H5N8/2015-01-17  
A/mallard/Maryland/07/OS864/2007/EPI\_ISL\_216639/PB1/H5N8/2007-06-27  
A/quail/California/K1400794/2014/EPI\_ISL\_170563/PB1/H5N8/2014-04-15  
A/mallard/California/2559P/2011/EPI\_ISL\_135091/PB1/H5N8/2011-08-12  
A/duck/Massachusetts/Sg\_00440/2005/EPI\_ISL\_26100/PB1/H5N5/2005-07-01  
A/ruddy\_turnstone/New\_Jersey/1851/2001/EPI\_ISL\_68068/PB1/H5N8/2001-07-01  
A/mallard/MN/105/2000/EPI\_ISL\_12548/PB1/H5N5/2000-07-01  
A/duck/HuBei/03/2010/EPI\_ISL\_130533/PB1/H5N6/2010-03-28  
A/goose/Zhejiang/925037/2014/EPI\_ISL\_203752/PB1/H5N8/2014-09-25  
A/duck/Eastern\_China/L1021/2012/EPI\_ISL\_208828/PB1/H5N8/2012-10-21  
A/duck/Eastern\_China/L0423/2011/EPI\_ISL\_208825/PB1/H5N8/2011-04-23  
A/Environment/Zhenjiang/2135/2014/EPI\_ISL\_170230/PB1/H5N8/2014-04-03  
A/duck/China/26372-48/2014/EPI\_ISL\_168024/PB1/H5N8/2014-11-18  
A/duck/Shandong/K1204/2009/EPI\_ISL\_139383/PB1/H5N5/2009-12-16  
A/duck/Guangdong/wy11/2008/EPI\_ISL\_152085/PB1/H5N5/2008-06-06  
A/chicken/Kostroma/1720/2017/EPI\_ISL\_297465/PB1/H5N2/2017-12-22  
A/chicken/Kostroma/1718/2017/EPI\_ISL\_295027/PB1/H5N2/2017-12-22  
A/chicken/Kostroma/1721/2017/EPI\_ISL\_297466/PB1/H5N2/2017-12-22  
A/chicken/Kostroma/19/2017/EPI\_ISL\_297467/PB1/H5N2/2017-12-22  
A/chicken/Kostroma/1717/2017/EPI\_ISL\_297463/PB1/H5N2/2017-12-22  
A/duck/Mongolia/83/2015/EPI\_ISL\_207030/PB1/H3N8/2015-08-30  
A/duck/Mongolia/2117/2015/EPI\_ISL\_209125/PB1/H3N8/2015-08-31  
A/duck/Mongolia/208/2015/EPI\_ISL\_209124/PB1/H3N8/2015-08-31  
A/duck/Mongolia/18/2015/EPI\_ISL\_209118/PB1/H3N8/2015-08-30  
A/snowbird/Chany/82K/2014/EPI\_ISL\_240672/PB1/H3N8/2014-09-10  
A/chicken/Rostov-on-Don/1321/2017/EPI\_ISL\_297234/PB1/H5N8/2017-10-18  
A/goose/Hungary/65817/2016/EPI\_ISL\_255174/PB1/H5N8/2016-12-18  
A/duck/Kumamoto/431119/2014/EPI\_ISL\_237166/PB1/H4N6/2014-11-15  
A/mallard/Novomyhalivka/10-23-12/2010/EPI\_ISL\_218877/PB1/H7N7/2010-12-23  
A/mallard/Akania-Nova/39-15-02/2011/EPI\_ISL\_218879/PB1/H7N7/2011-06-15  
A/mallard/Nizhnegorsk/3-06-10/2010/EPI\_ISL\_218878/PB1/H7N7/2010-10-06  
A/mallard\_duck/Georgia/3/2012/EPI\_ISL\_267350/PB1/H7N3/2012-01-30  
A/mallard/Netherlands/12005909/2012/EPI\_ISL\_291187/PB1/H1N1/2012-03-16  
A/mallard/Sweden/133546/2011/EPI\_ISL\_189392/PB1/H10N4/2011-11-23  
A/mallard\_duck/Sweden/139579/2012/EPI\_ISL\_267428/PB1/H1N5/2012-11-28  
A/mallard\_duck/Sweden/139703/2012/EPI\_ISL\_267429/PB1/H1N5/2012-11-28  
A/mallard\_duck/Sweden/139647/2012/EPI\_ISL\_267408/PB1/H1N5/2012-11-30  
A/mallard\_duck/Sweden/139752/2012/EPI\_ISL\_267395/PB1/H1N5/2012-12-03  
A/mallard\_duck/Sweden/139937/2012/EPI\_ISL\_267161/PB1/H1N5/2012-12-06  
A/mallard\_duck/Sweden/139899/2012/EPI\_ISL\_267161/PB1/H1N5/2012-12-05  
A/chicken/NL-Barneveld/15004745-006-010/2015/EPI\_ISL\_192866/PB1/H7N7/2015-03-11  
A/chicken/England/26352/2015/EPI\_ISL\_191604/PB1/H7N7/2015-07-09  
A/chicken/Netherlands/13003983/2013/EPI\_ISL\_309812/PB1/H7N7/2013-03-18  
A/mallard\_duck/Netherlands/21/2014/EPI\_ISL\_267261/PB1/H4N6/2014-08-26  
A/mallard\_duck/Netherlands/8/2014/EPI\_ISL\_267186/PB1/H7N5/2014-10-28  
A/mallard/Netherlands/150136/2015/EPI\_ISL\_291192/PB1/H5N5/2015-09-06  
A/mallard/Netherlands/150119/2015/EPI\_ISL\_291191/PB1/H1N2/2015-08-06  
A/mallard\_duck/Netherlands/24/2014/EPI\_ISL\_267389/PB1/H7N3/2014-09-30  
A/mallard\_duck/Netherlands/10/2013/EPI\_ISL\_267417/PB1/H4N6/2013-12-04  
A/mallard\_duck/Netherlands/6/2013/EPI\_ISL\_243553/PB1/H3N8/2013-10-01  
A/Turkey/Netherlands/11011530/2011/EPI\_ISL\_309823/PB1/H7N7/2011-06-25  
A/chicken/Netherlands/11011530/2011/EPI\_ISL\_309819/PB1/H7N7/2011-06-23  
A/chicken/Netherlands/11008327/2011/EPI\_ISL\_309829/PB1/H7N7/2011-05-12  
A/Turkey/Netherlands/12004763-001-004/2012/EPI\_ISL\_309825/PB1/H10N9/2012-03-05  
A/Turkey/Netherlands/12005615/2012/EPI\_ISL\_309826/PB1/H10N9/2012-03-13  
A/chicken/Netherlands/12002495-001-005/2012/EPI\_ISL\_309809/PB1/H10N9/2012-02-06  
A/mallard/Republic\_of\_Georgia/3/2011/EPI\_ISL\_189687/PB1/H3N8/2011-09-20  
A/mallard\_duck/Netherlands/28/2011/EPI\_ISL\_243668/PB1/H1N1/2011-10-10  
A/chicken/Riyadh/A16/2017/EPI\_ISL\_306912/PB1/H5N8/2017-07-01  
A/Bulbul/Riyadh/A14/2017/EPI\_ISL\_306955/PB1/H5N8/2017-07-01  
A/Turkey/Riyadh/A11/2017/EPI\_ISL\_306910/PB1/H5N8/2017-07-01  
A/Falcon/Riyadh/A15/2017/EPI\_ISL\_306956/PB1/H5N8/2017-07-01  
A/chicken/A1-Ahsaa/A18/2017/EPI\_ISL\_306959/PB1/H5N8/2017-07-01  
A/chicken/A1-Ahsaa/A17/2017/EPI\_ISL\_306913/PB1/H5N8/2017-07-01  
A/chicken/Riyadh/A10/2017/EPI\_ISL\_306914/PB1/H5N8/2017-07-01  
A/duck/Riyadh/A12/2017/EPI\_ISL\_306911/PB1/H5N8/2017-07-01(2)  
A/duck/Riyadh/A12/2017/EPI\_ISL\_306911/PB1/H5N8/2017-07-01  
A/ornamental\_bird/A1-Qasim/9/2017/EPI\_ISL\_306958/PB1/H5N8/2017-07-01  
A/chicken/Riyadh/A15/2018/EPI\_ISL\_306915/PB1/H5N8/2017-07-01  
A/Holland\_pigeon/Riyadh/A13/2017/EPI\_ISL\_306959/PB1/H5N8/2017-07-01  
A/duck/Bangladesh/33137/2017/EPI\_ISL\_329591/PB1/H3N2/2017-07-21  
A/environment/Kamchatka/18/2016/EPI\_ISL\_256301/PB1/H5N5/2016-10-01  
A/mute\_swan/Poland/64/2017/EPI\_ISL\_255917/PB1/H5N5/2017-01-31  
A/common\_buzzard/Germany-SN/R5/2017/EPI\_ISL\_256074/PB1/H5N5/2017-02-06  
A/mute\_swan/Hungary/58/2017/EPI\_ISL\_256462/PB1/H5N5/2017-02-14  
A/swan/Poland/81/2017/EPI\_ISL\_300746/PB1/H5N5/2017-02-02  
A/mute\_swan/Croatia/42/2017/EPI\_ISL\_243698/PB1/H5N5/2017-01-20  
A/gadwall/Italy/17VIR133-2/2017/EPI\_ISL\_255189/PB1/H5N5/2017-01-10  
A/chicken/Croatia/104/2017/EPI\_ISL\_255190/PB1/H5N5/2017-01-07  
A/wigeon/Italy/16R5616-1/2016/EPI\_ISL\_243085/PB1/H5N5/2016-12-29  
A/mute\_swan/Croatia/102/2016/EPI\_ISL\_240101/PB1/H5N5/2016-12-27  
A/greylag\_goose/Germany-NI/AR11353-L02142/2016/EPI\_ISL\_262056/PB1/H5N5/2016-12-27  
A/swan/Germany-SN/R10645/2016/EPI\_ISL\_240893/PB1/H5N5/2016-12-13  
A/M\_Swan/NL-Groningen/16015826-00T/2016/EPI\_ISL\_287565/PB1/H5N5/2016-12-13  
A/grey\_heron/Germany-SN/R572/2017/EPI\_ISL\_263057/PB1/H5N5/2017-01-22  
A/common\_teal/Chany/891/2018/EPI\_ISL\_333612/PB1/H3N6/2018-09-01  
A/common\_teal/Chany/889/2018/EPI\_ISL\_333611/PB1/H3N6/2018-09-01  
A/common\_teal/Chany/892/2018/EPI\_ISL\_333613/PB1/H3N6/2018-09-01  
A/common\_teal/Chany/893/2018/EPI\_ISL\_333614/PB1/H3N6/2018-09-01  
A/duck/Mongolia/141/2015/EPI\_ISL\_209116/PB1/N2/2015-08-30  
A/duck/Bangladesh/3122/2016/EPI\_ISL\_209129/PB1/H6N2/2016-11-25  
A/duck/Mongolia/820/2015/EPI\_ISL\_209129/PB1/H1N1/2015-08-31  
A/duck/Mongolia/326/2015/EPI\_ISL\_206308/PB1/H10N3/2015-08-15  
A/duck/Mongolia/245/2015/EPI\_ISL\_206307/PB1/H10N3/2015-08-15  
A/duck/Mongolia/626/2015/EPI\_ISL\_206695/PB1/H10N7/2015-08-31  
A/duck/Mongolia/489/2015/EPI\_ISL\_206696/PB1/H10N7/2015-08-31  
A/duck/Mongolia/789/2015/EPI\_ISL\_206698/PB1/H10N7/2015-08-31  
A/duck/Fukuoka/401202/2016/EPI\_ISL\_242402/PB1/H4N6/2016-12-14  
A/duck/Aichi/231003/2016/EPI\_ISL\_239394/PB1/H8N4/2016-10-18  
A/teal/Russia Primorie/390/2016/EPI\_ISL\_240676/PB1/H1N1/2016-04-11  
A/gadwall/Russia Primorie/394/2016/EPI\_ISL\_240675/PB1/H1N1/2016-04-11  
A/duck/Ibaraki/F10-2-3/2017/EPI\_ISL\_257414/PB1/H7N7/2018-02-21  
A/duck/Aichi/231001/2016/EPI\_ISL\_239392/PB1/H8N4/2016-10-18  
A/duck/HuBei/ZYSYG7/2015/EPI\_ISL\_252818/PB1/H6N2/2015-11-21  
A/duck/HuBei/ZYSYG8/2015/EPI\_ISL\_252819/PB1/H6N2/2015-11-21  
A/duck/HuBei/ZYSYG3/2015/EPI\_ISL\_252817/PB1/H6N2/2015-11-21  
A/mallard/Republic\_of\_Georgia/12/2011/2011/EPI\_ISL\_189692/PB1/H10N4/2011-02-11  
A/mallard/Republic\_of\_Georgia/1/2012/EPI\_ISL\_189702/PB1/H1N1/2012-01-10  
A/mallard/Republic\_of\_Georgia/14/2011/EPI\_ISL\_189714/PB1/H10N7/2011-12-13  
A/mallard/Sweden/80261/2008/EPI\_ISL\_158187/PB1/H4N9/2008-11-21  
A/ Guinea\_fowl/Italy/10VIR-218-134/2010/EPI\_ISL\_144902/PB1/H5N2/2010-01-12  
A/greylag\_goose/Poland/74/2010/EPI\_ISL\_254327/PB1/H5N2/2010-03-25  
A/white-fronted\_goose/Netherlands/3/2010/EPI\_ISL\_267289/PB1/H5N2/2010-01-29  
A/greater\_white-fronted\_goose/Netherlands/2/2010/EPI\_ISL\_243542/PB1/H5N2/2010-01-29  
A/duck/Egypt/SS19/2017/EPI\_ISL\_268021/PB1/H5N8/2017-01-12  
A/quail/Jiangsu/k0104/2010/EPI\_ISL\_139386/PB1/H5N5/2010-01-08  
A/chicken/Changzhou/cz93/2014/EPI\_ISL\_170234/PB1/H5N8/2014-10-28  
A/duck/Quang\_Ninh/192511/2013/EPI\_ISL\_179386/PB1/H5N8/2013-04-10  
A/duck/Taiwan/A3400/2015/EPI\_ISL\_219874/PB1/H5N8/2015-02-08  
A/duck/Eastern\_China/S1109/2014/EPI\_ISL\_208841/PB1/H5N8/2014-11-09  
A/egret/Germany-SH/R1459/2017/EPI\_ISL\_259525/PB1/H5N5/2017-02-14  
A/cormorant/Germany-SH/R896/2017/EPI\_ISL\_260059/PB1/H5N5/2017-01-30  
A/goose/Italy/708/2016/EPI\_ISL\_208811/PB1/H5N6/2016-08-22  
A/Geese/South\_Africa/SS17/09\_0055\_P1/2017/EPI\_ISL\_285648/PB1/H5N8/2017-09-04  
A/chicken/Cheboksary/854/2018/EPI\_ISL\_320957/PB1/H5N8/2018-07-31  
A/tufted\_duck/Germany/AR8444-L01987/2016/EPI\_ISL\_237944/PB1/H5N8/2016-11-07  
A/T\_DkNL-Werkendam/16014159-001/2016/EPI\_ISL\_287564/PB1/H5N5/2016-11-14  
A/black-headed\_gull/Tyva/41/2016/EPI\_ISL\_231685/PB1/H5N8/2016-05-25  
A/duck/Eastern\_China/S1210/2013/EPI\_ISL\_179382/PB1/H5N8/2013-12-10  
A/goose/Taiwan/01019/2015/EPI\_ISL\_219875/PB1/H5N8/2015-01-11  
A/Duck/Hunnan/70/2004/EPI\_ISL\_24750/PB1/H5N5/2004-07-01



# PB1 H5N5-GT3

- H5N5-GT1
- H5N5-GT2
- H5N5-GT3

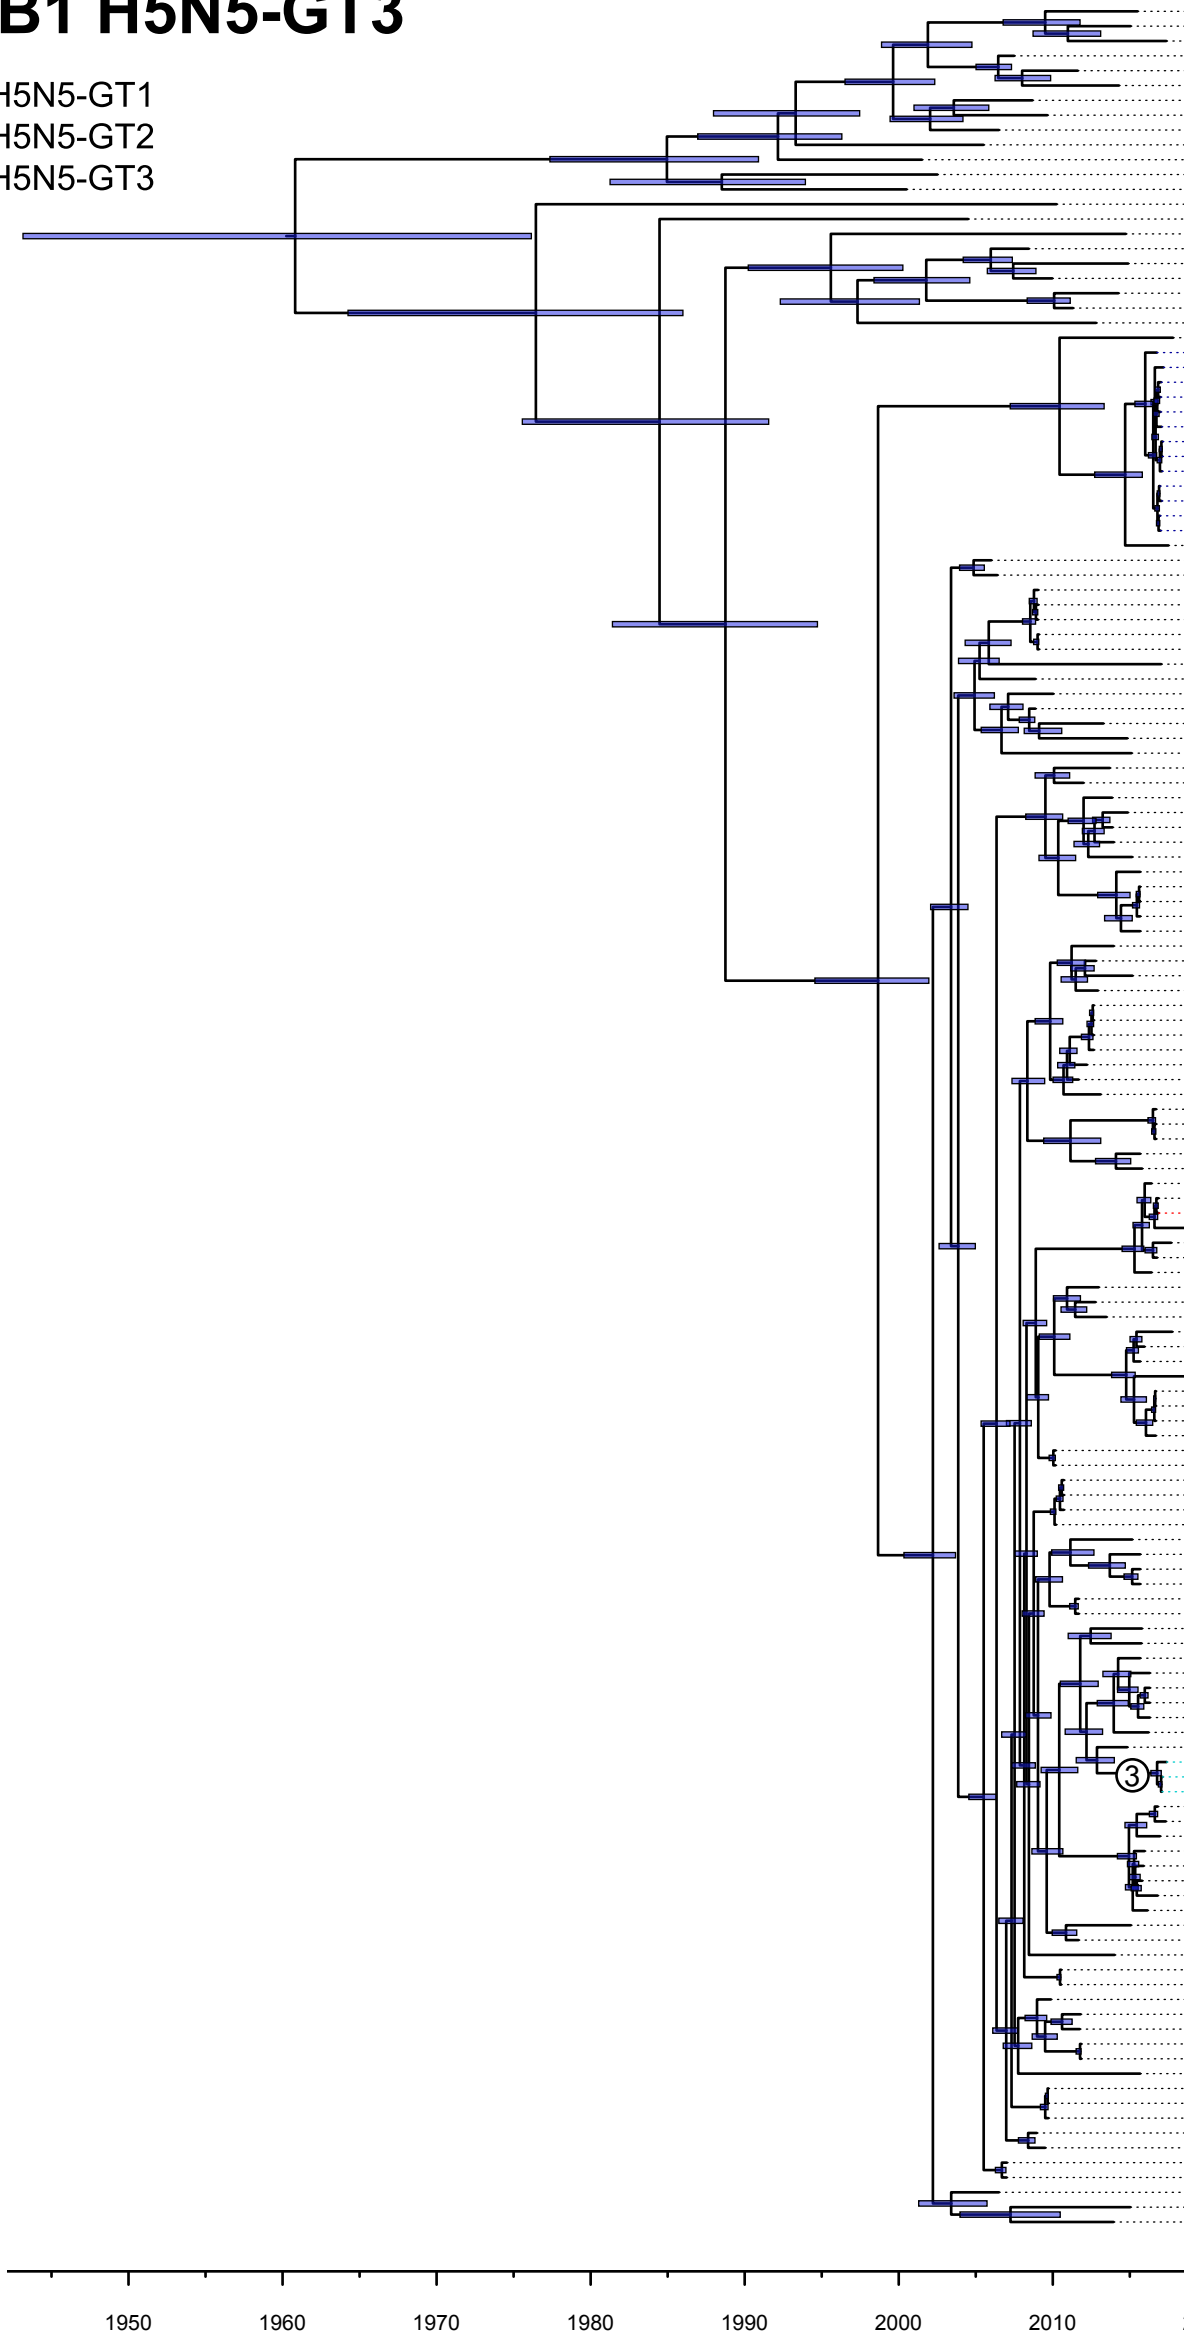

A/Chinstrap\_penguin/Antarctica/15459/2015/EPI\_ISL\_224756/PB1/H5N5/2015-07-01  
A/American\_wigeon/California/UCD58P/2015/EPT\_ISL\_255012/PB1/H5N8/2015-01-17  
A/environment/New\_Jersey/UCA117-2155/2017/EPI\_ISL\_307688/PB1/H5N8/2017-05-14  
A/mallard/Maryland/07-0864/2007/EPI\_ISL\_216639/PB1/H5N8/2007-06-27  
A/mallard/California/2559P/2011/EPI\_ISL\_135091/PB1/H5N8/2011-08-12  
A/quail/California/K1400794/2014/EPT\_ISL\_170563/PB1/H5N8/2014-04-15  
A/pheasant/Idaho/08-002590-63/2008/EPT\_ISL\_328436/PB1/H5N8/2008-09-03  
A/mallard/Alberta/383/2009/EPI\_ISL\_278197/PB1/H5N5/2009-08-22  
A/avian/Colorado/45648/2006/EPI\_ISL\_79750/PB1/H5N8/2006-07-01  
A/duck/Massachusetts/Sg\_00440/2005/EPI\_ISL\_26100/PB1/H5N5/2005-07-01  
A/ruddy\_turnstone/New\_Jersey/1851/2001/EPT\_ISL\_68068/PB1/H5N8/2001-07-01  
A/duck/NY/191255-59/02/EPT\_ISL\_3488/PB1/H5N8/2002-07-01  
A/mallard/MN/105/2000/EPI\_ISL\_12546/PB1/H5N5/2000-07-01  
A/duck/HuBei/03/2010/EPI\_ISL\_130353/PB1/H5N5/2010-03-28  
A/duck/Hunan/70/2004/EPI\_ISL\_24750/PB1/H5N5/2004-07-01  
A/goose/Zhejiang/92503/2014/EPI\_ISL\_203752/PB1/H5N8/2014-09-25  
A/duck/Guangdong/wy11/2008/EPI\_ISL\_152085/PB1/H5N5/2008-06-06  
A/duck/Chiba/26-372-48/2014/EPT\_ISL\_168024/PB1/H5N8/2014-11-18  
A/goose/Shandong/k1204/2009/EPT\_ISL\_139383/PB1/H5N5/2009-12-16  
A/environment/Zhejiang/z135/2014/EPT\_ISL\_170230/PB1/H5N8/2014-04-03  
A/duck/Eastern\_China/L0423/2011/EPT\_ISL\_208825/PB1/H5N8/2011-04-23  
A/duck/Eastern\_China/L021/2012/EPT\_ISL\_208828/PB1/H5N8/2012-10-21  
A/chicken/Rostov-on-Don/1321/2017/EPT\_ISL\_297234/PB1/H5N8/2017-10-18  
A/environment/Kamchatka/18/2016/EPT\_ISL\_256301/PB1/H5N5/2016-10-01  
A/chicken/Croatia/104/2017/EPT\_ISL\_261332/PB1/H5N5/2017-03-07  
A/gadwall/Italy/17VIR33-2/2017/EPT\_ISL\_255189/PB1/H5N5/2017-01-10  
A/wigeon/Italy/16VIR616-3/2016/EPT\_ISL\_243085/PB1/H5N5/2016-12-29  
A/mute\_swan/Croatia/102/2016/EPT\_ISL\_240101/PB1/H5N5/2016-12-27  
A/mute\_swan/Croatia/42/2017/EPT\_ISL\_243698/PB1/H5N5/2017-01-20  
A/mute\_swan/Hungary/5879/2017/EPT\_ISL\_256462/PB1/H5N5/2017-02-14  
A/common\_buzzard/Germany-SN/R1117/2017/EPT\_ISL\_259074/PB1/H5N5/2017-02-06  
A/mute\_swan/Poland/64/2017/EPT\_ISL\_255917/PB1/H5N5/2017-01-31  
A/swan/Germany-SN/R10645/2016/EPT\_ISL\_240893/PB1/H5N5/2016-12-13  
A/grey\_lag/goose/Germany-SN/R572/2017/EPT\_ISL\_280058/PB1/H5N5/2017-01-22  
A/m\_swan/NL-Groningen/16015826-001/2016/EPT\_ISL\_287565/PB1/H5N5/2016-12-13  
A/grey\_lag/goose/Germany-NI/AR11353-L02142/2016/EPT\_ISL\_262056/PB1/H5N5/2016-12-27  
A/duck/Riyadh/AI2/2017/EPT\_ISL\_306911/PB1/H5N8/2017-07-01  
A/duck/Akita/714/06/EPT\_ISL\_288011/PB1/H5N2/2006-01-01  
A/herring\_gull/Sarajevo/516/2006/EPT\_ISL\_26874/PB1/H6N1/2006-05-25  
A/mallard\_duck/Netherlands/3/2009/EPT\_ISL\_329033/PB1/H7N7/2009-01-15  
A/mallard\_duck/Netherlands/4/2009/EPT\_ISL\_329032/PB1/H7N7/2009-01-17  
A/mallard\_duck/Netherlands/2/2009/EPT\_ISL\_243590/PB1/H7N7/2009-01-09  
A/mallard\_duck/Netherlands/7/2009/EPT\_ISL\_243466/PB1/H7N7/2009-02-02  
A/mallard\_duck/Netherlands/6/2009/EPT\_ISL\_329027/PB1/H7N7/2009-02-02  
A/duck/Egypt/S19/2017/EPT\_ISL\_268021/PB1/H5N8/2017-01-12  
A/mallard/Sweden/791967/2008/EPT\_ISL\_18943/PB1/H5N8/2008-11-12  
A/quail/Jiangsu/K0104/2010/EPT\_ISL\_139386/PB1/H5N5/2010-01-08  
A/duck/Hokkaido/221/2008/EPT\_ISL\_136685/PB1/H3N6/2008-11-11  
A/duck/Quang\_Ninh/19c511/2013/EPT\_ISL\_179386/PB1/H5N8/2013-04-10  
A/chicken/Changzhou/cz93/2014/EPT\_ISL\_170234/PB1/H5N8/2014-10-28  
A/duck/Taiwan/A3400/2015/EPT\_ISL\_219874/PB1/H5N8/2015-02-08  
A/mallard\_duck/Netherlands/2/2013/EPT\_ISL\_267342/PB1/H3N6/2013-09-10  
A/mallard/Republic\_of\_Georgia/15/2011/EPT\_ISL\_190353/PB1/H10N7/2011-12-24  
A/duck/Vietnam/LBM533/2013/EPT\_ISL\_158814/PB1/H3N6/2013-11-04  
A/duck/Eastern\_China/S1109/2014/EPT\_ISL\_208841/PB1/H5N8/2014-11-09  
A/duck/Saga/4T1117/2013/EPT\_ISL\_237137/PB1/H6N1/2013-11-15  
A/duck/Kagoshima/461219/2013/EPT\_ISL\_237176/PB1/H4N6/2013-12-15  
A/duck/Bangladesh/24704/2015/EPT\_ISL\_25707/PB1/H15N9/2015-02-22  
A/duck/Mongolia/518/2015/EPT\_ISL\_206694/PB1/H10N3/2015-08-31  
A/duck/Mongolia/482/2015/EPT\_ISL\_209128/PB1/H2N3/2015-08-31  
A/duck/Mongolia/655/2015/EPT\_ISL\_209132/PB1/H2N3/2015-08-31  
A/duck/Mongolia/742/2015/EPT\_ISL\_206697/PB1/H10N7/2015-08-31  
A/duck/Mongolia/20/2015/EPT\_ISL\_209123/PB1/H3N9/2015-08-31  
A/mallard/Korea/WB566/2013/EPT\_ISL\_309235/PB1/H7N7/2013-12-11  
A/duck/Saga/411005/2012/EPT\_ISL\_237183/PB1/H11N2/2012-10-15  
A/environment/Korea/H2438/2015/EPT\_ISL\_309238/PB1/H7N7/2015-03-02  
A/northern\_pintail/Korea/WB1833/2012/EPT\_ISL\_309230/PB1/H7N1/2012-12-02  
A/shoveller/Chany\_Lake/101/2012/EPT\_ISL\_231645/PB1/H4N6/2012-08-26  
A/teal/Chany\_Lake/104\_cloaca/2012/EPT\_ISL\_231649/PB1/H4N6/2012-08-26  
A/teal/Chany\_Lake/104\_feather/2012/EPT\_ISL\_231649/PB1/H4N6/2012-08-26  
A/teal/Chany\_Lake/106\_cloaca/2012/EPT\_ISL\_231650/PB1/H4N6/2012-08-26  
A/duck/Guangxi/113/2012/EPT\_ISL\_273054/PB1/H6N8/2012-03-16  
A/duck/Mongolia/262/2011/EPT\_ISL\_290236/PB1/H4N6/2011-09-01  
A/environment/Korea/A01-1/2013/EPT\_ISL\_309232/PB1/H7N1/2013-02-04  
A/pintail/Chany/198/2016/EPT\_ISL\_250234/PB1/H5N8/2016-09-10  
A/teal/Chany/135/2016/EPT\_ISL\_250232/PB1/H5N8/2016-09-10  
A/mallard/Chany/185/2016/EPT\_ISL\_250233/PB1/H3N8/2016-09-10  
A/duck/Mongolia/66/2015/EPT\_ISL\_207031/PB1/H10N2/2015-08-30  
A/duck/Okinawa/471017/2015/EPT\_ISL\_237148/PB1/H4N6/2015-10-15  
A/great\_creted\_grebe/Uvs-Nuur\_Lake/341/2016/EPT\_ISL\_224580/PB1/H5N8/2016-05-25  
A/tufted\_duck/Germany/AR444-L01987/2016/EPT\_ISL\_237944/PB1/H5N8/2016-11-07  
**A1 DK/NL-Wekenham/16014158-001/2016/EPT\_ISL\_257564/PB1/H5N5/2016-11-14**  
A/chicken/Cheboksary/854/2018/EPT\_ISL\_320957/PB1/H5N8/2018-07-31  
A/geese/South\_Africa/S2017/09\_0055\_P1/2017/EPT\_ISL\_285648/PB1/H5N8/2017-09-04  
A/domestic\_duck/Siberia/103/2016/EPT\_ISL\_240677/PB1/H5N8/2016-10-04  
A/black-headed\_gull/Tyva/41/2016/EPT\_ISL\_231685/PB1/H5N8/2016-05-25  
A/wild\_bird/Korea/A412/2012/EPT\_ISL\_29794/PB1/H1N1/2012-12-21  
A/duck/Hokkaido/W26/2012/EPT\_ISL\_293518/PB1/H12N1/2012-10-04  
A/duck/Jiangxi/15867/2013/EPT\_ISL\_181451/PB1/H10N3/2013-06-23  
A/duck/Bangladesh/33638/2017/EPT\_ISL\_329566/PB1/H4N2/2017-09-28  
A/duck/Bangladesh/26918/2015/EPT\_ISL\_257070/PB1/H3N6/2015-12-09  
A/duck/Mongolia/179/2015/EPT\_ISL\_209121/PB1/H3N8/2015-08-30  
A/gadwall/Chany/3018/2018/EPT\_ISL\_333615/PB1/H3N8/2018-10-19  
A/teal/Toguchin/1156/2016/EPT\_ISL\_332681/PB1/H6N1/2016-09-03  
A/teal/Toguchin/1157/2016/EPT\_ISL\_332682/PB1/H6N1/2016-09-03  
A/mallard/Toguchin/1154/2016/EPT\_ISL\_332679/PB1/H6N1/2016-09-03  
A/teal/Toguchin/1153/2016/EPT\_ISL\_332677/PB1/H6N1/2016-09-03  
A/chicken/Hunan/S1248/2010/EPT\_ISL\_206811/PB1/H4N6/2010-03-03  
A/duck/Bangladesh/1728/2010/EPT\_ISL\_206812/PB1/H4N6/2010-03-03  
A/duck/Bangladesh/1729/2010/EPT\_ISL\_165783/PB1/H11N3/2010-09-17  
A/duck/Bangladesh/1729/2010/EPT\_ISL\_165783/PB1/H11N3/2010-09-17  
A/duck/Bangladesh/1727/2010/EPT\_ISL\_165781/PB1/H11N3/2010-09-17  
A/environment/Bangladesh/1002/2010/EPT\_ISL\_165785/PB1/H11N3/2010-03-14  
A/duck/Bangladesh/24694/2015/EPT\_ISL\_257050/PB1/H7N1/2015-02-22  
A/duck/Mongolia/996/2015/EPT\_ISL\_209135/PB1/H3N8/2015-08-31  
A/duck/Mongolia/118/2015/EPT\_ISL\_209114/PB1/H3N6/2015-08-30  
A/duck/Mongolia/405/2015/EPT\_ISL\_209127/PB1/H3N6/2015-08-31  
A/duck/Mongolia/258/2011/EPT\_ISL\_290235/PB1/H8N4/2011-09-03  
A/duck/Mongolia/565/2011/EPT\_ISL\_298540/PB1/H8N4/2011-09-03  
A/mallard\_duck/Georgia/7/2015/EPT\_ISL\_328971/PB1/H6N1/2015-10-10  
A/common\_teal/Netherlands/1/2015/EPT\_ISL\_328977/PB1/H11N1/2015-09-29  
A/duck/Mongolia/543/2015/EPT\_ISL\_209111/PB1/H4N6/2015-08-31  
A/mallard/Beijing/25/2016/EPT\_ISL\_280495/PB1/H4N6/2016-04-15  
A/mallard/Beijing/16/2016/EPT\_ISL\_280494/PB1/H4N6/2016-04-15  
A/mallard/Beijing/10/2016/EPT\_ISL\_280493/PB1/H4N6/2016-04-15  
A/mallard/Beijing/6/2016/EPT\_ISL\_280492/PB1/H4N6/2016-04-15  
A/duck/Miyazaki/450307/2016/EPT\_ISL\_237167/PB1/H1N1/2016-03-15  
A/mallard\_duck/Netherlands/9/2012/EPT\_ISL\_267352/PB1/H6N2/2014-10-28  
A/Go/NL-Drecht/17006881-001/2017/EPT\_ISL\_288411/PB1/H5N5/2017-05-22  
A/gret/Germany-SH/R1459/2017/EPT\_ISL\_259525/PB1/H5N5/2017-02-14  
A/cormorant/Germany-SH/R896/2017/EPT\_ISL\_260059/PB1/H5N5/2017-01-30  
A/duck/Fukui/181015/2016/EPT\_ISL\_239390/PB1/H6N2/2016-10-21  
A/mallard/Khabarovsk/241/2017/EPT\_ISL\_333427/PB1/H10N6/2017-04-28  
A/duck/Ibaraki/22/2016/EPT\_ISL\_220616/PB1/H5N9/2016-12-14  
A/duck/Yamaguchi/351211/2015/EPT\_ISL\_237155/PB1/H5N3/2015-12-15  
A/duck/Fukui/181111/2015/EPT\_ISL\_239414/PB1/H9N3/2015-11-19  
A/duck/Tokushima/361002/2015/EPT\_ISL\_237173/PB1/H5N3/2015-10-15  
A/duck/Aichi/231019/2016/EPT\_ISL\_239399/PB1/H3N8/2016-10-18  
A/duck/Ibaraki/F4-2-1/2017/EPT\_ISL\_257415/PB1/H7N7/2016-02-20  
A/duck/Bangladesh/24288/2015/EPT\_ISL\_309174/PB1/H10N6/2015-01-23  
A/duck/Mongolia/53/2011/EPT\_ISL\_298539/PB1/H3N8/2011-09-01  
A/goose/Karachi/NARC-13N-969/2014/EPT\_ISL\_294560/PB1/H14N3/2014-01-03  
A/duck/Bangladesh/1687/2010/EPT\_ISL\_165788/PB1/H1N1/2010-07-16  
A/duck/Bangladesh/31687/2010/EPT\_ISL\_165791/PB1/H1N1/2010-07-11  
A/mallard/Sweden/101900/2009/EPT\_ISL\_158398/PB1/H3N3/2009-11-14  
A/mallard\_duck/Netherlands/30/2011/EPT\_ISL\_243398/PB1/H6N1/2011-10-19  
A/mallard\_duck/Netherlands/22/2011/EPT\_ISL\_267370/PB1/H4N6/2011-09-30  
A/grey\_lag/goose/Iceland/0948/2011/EPT\_ISL\_148225/PB1/H6N5/2011-11-01  
A/grey\_lag/goose/Iceland/0953/2011/EPT\_ISL\_148226/PB1/H6N5/2011-11-01  
A/duck/Mongolia/173/2015/EPT\_ISL\_209119/PB1/H3N8/2015-08-30  
A/velvet\_scorer/Mongolia/878VZ/2009/EPT\_ISL\_149901/PB1/H10N8/2009-09-15  
A/surf\_scorer/Mongolia/878V/2009/EPT\_ISL\_149888/PB1/H10N8/2009-09-15  
A/northern\_shoveler/Mongolia/907V/2009/EPT\_ISL\_49854/PB1/H10N8/2009-09-15  
A/duck/Yunnan/2908/2009/EPT\_ISL\_146333/PB1/H11N9/2009-07-01  
A/shoveler/Egypt/00241-NAMRU3/2007/EPT\_ISL\_120202/PB1/H7N3/2007-01-05  
A/shoveler/Egypt/00006-NAMRU3/2007/EPT\_ISL\_120205/PB1/H10N1/2006-12-29  
A/avian/Egypt/920431/2009/EPT\_ISL\_80924/PB1/H7N2/2006-07-01  
A/goose/Taiwan/01019/2015/EPT\_ISL\_219875/PB1/H5N8/2015-01-11  
A/duck/Eastern\_China/S1210/2013/EPT\_ISL\_208832/PB1/H5N8/2013-12-10

PA

- H5N5-GT1
- H5N5-GT2
- H5N5-GT3

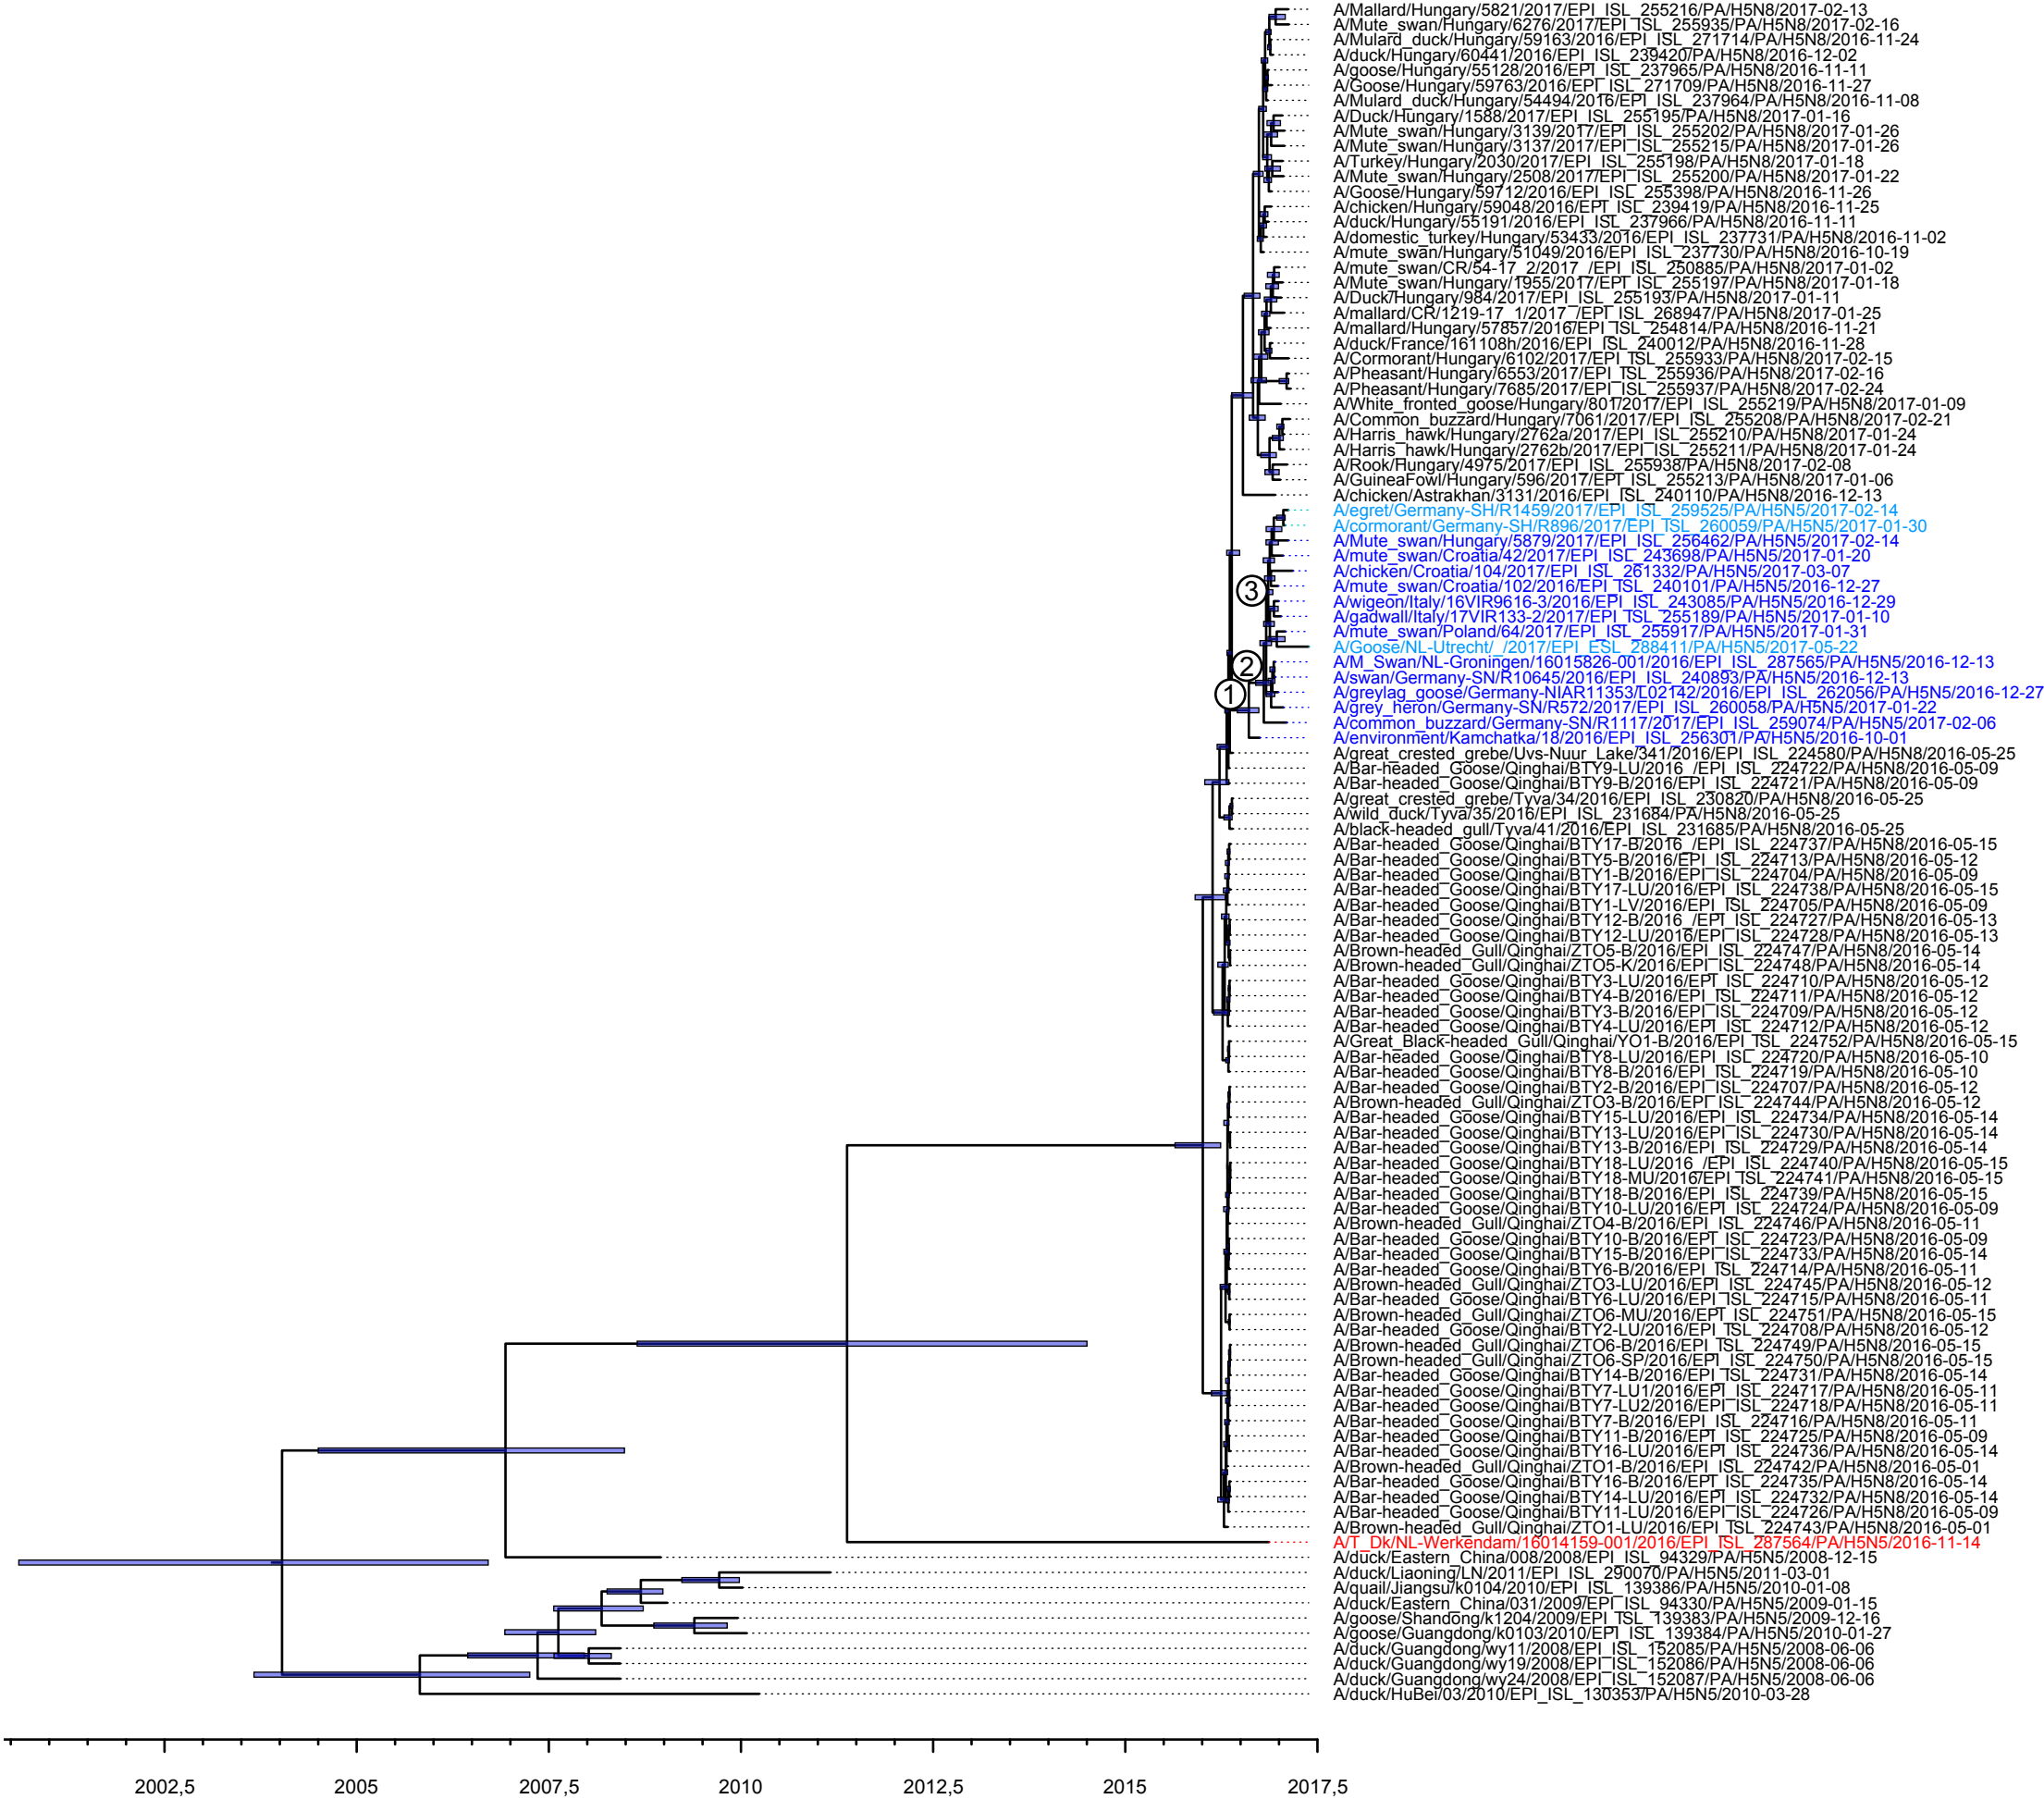



**HA**

- H5N5-GT1
- H5N5-GT2
- H5N5-GT3

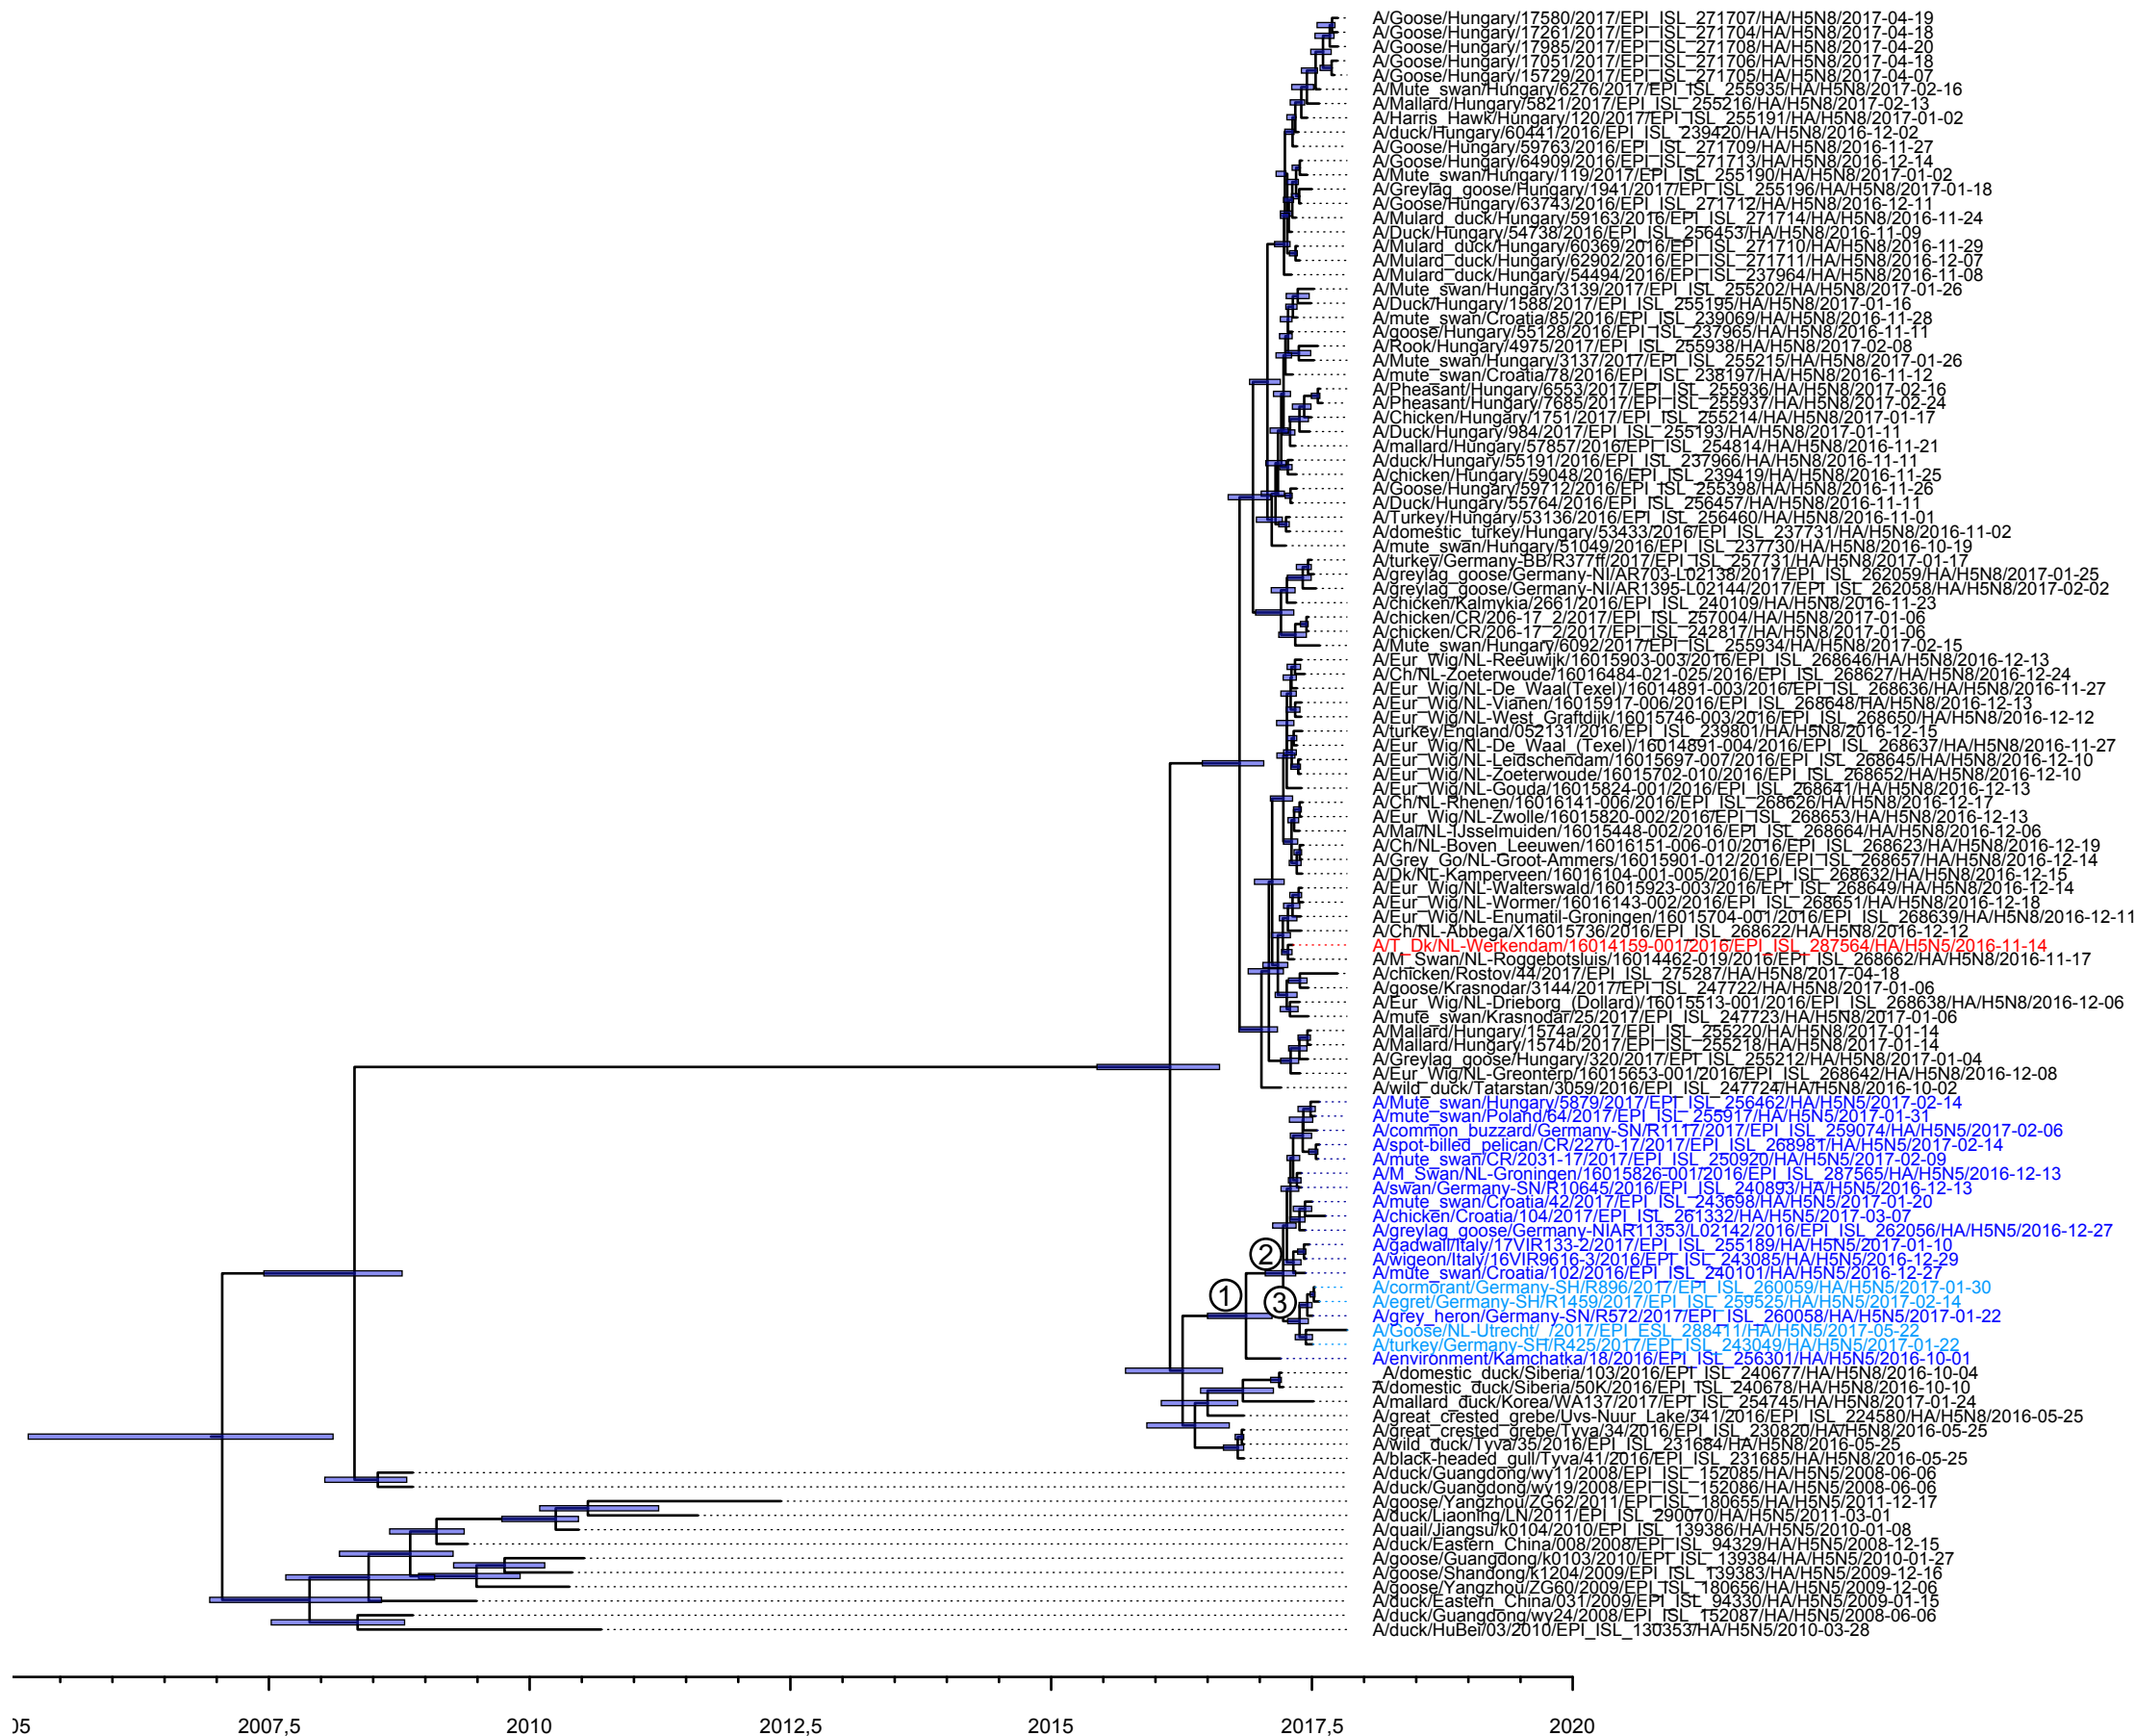

# NA

- H5N5-GT1
- H5N5-GT2
- H5N5-GT3

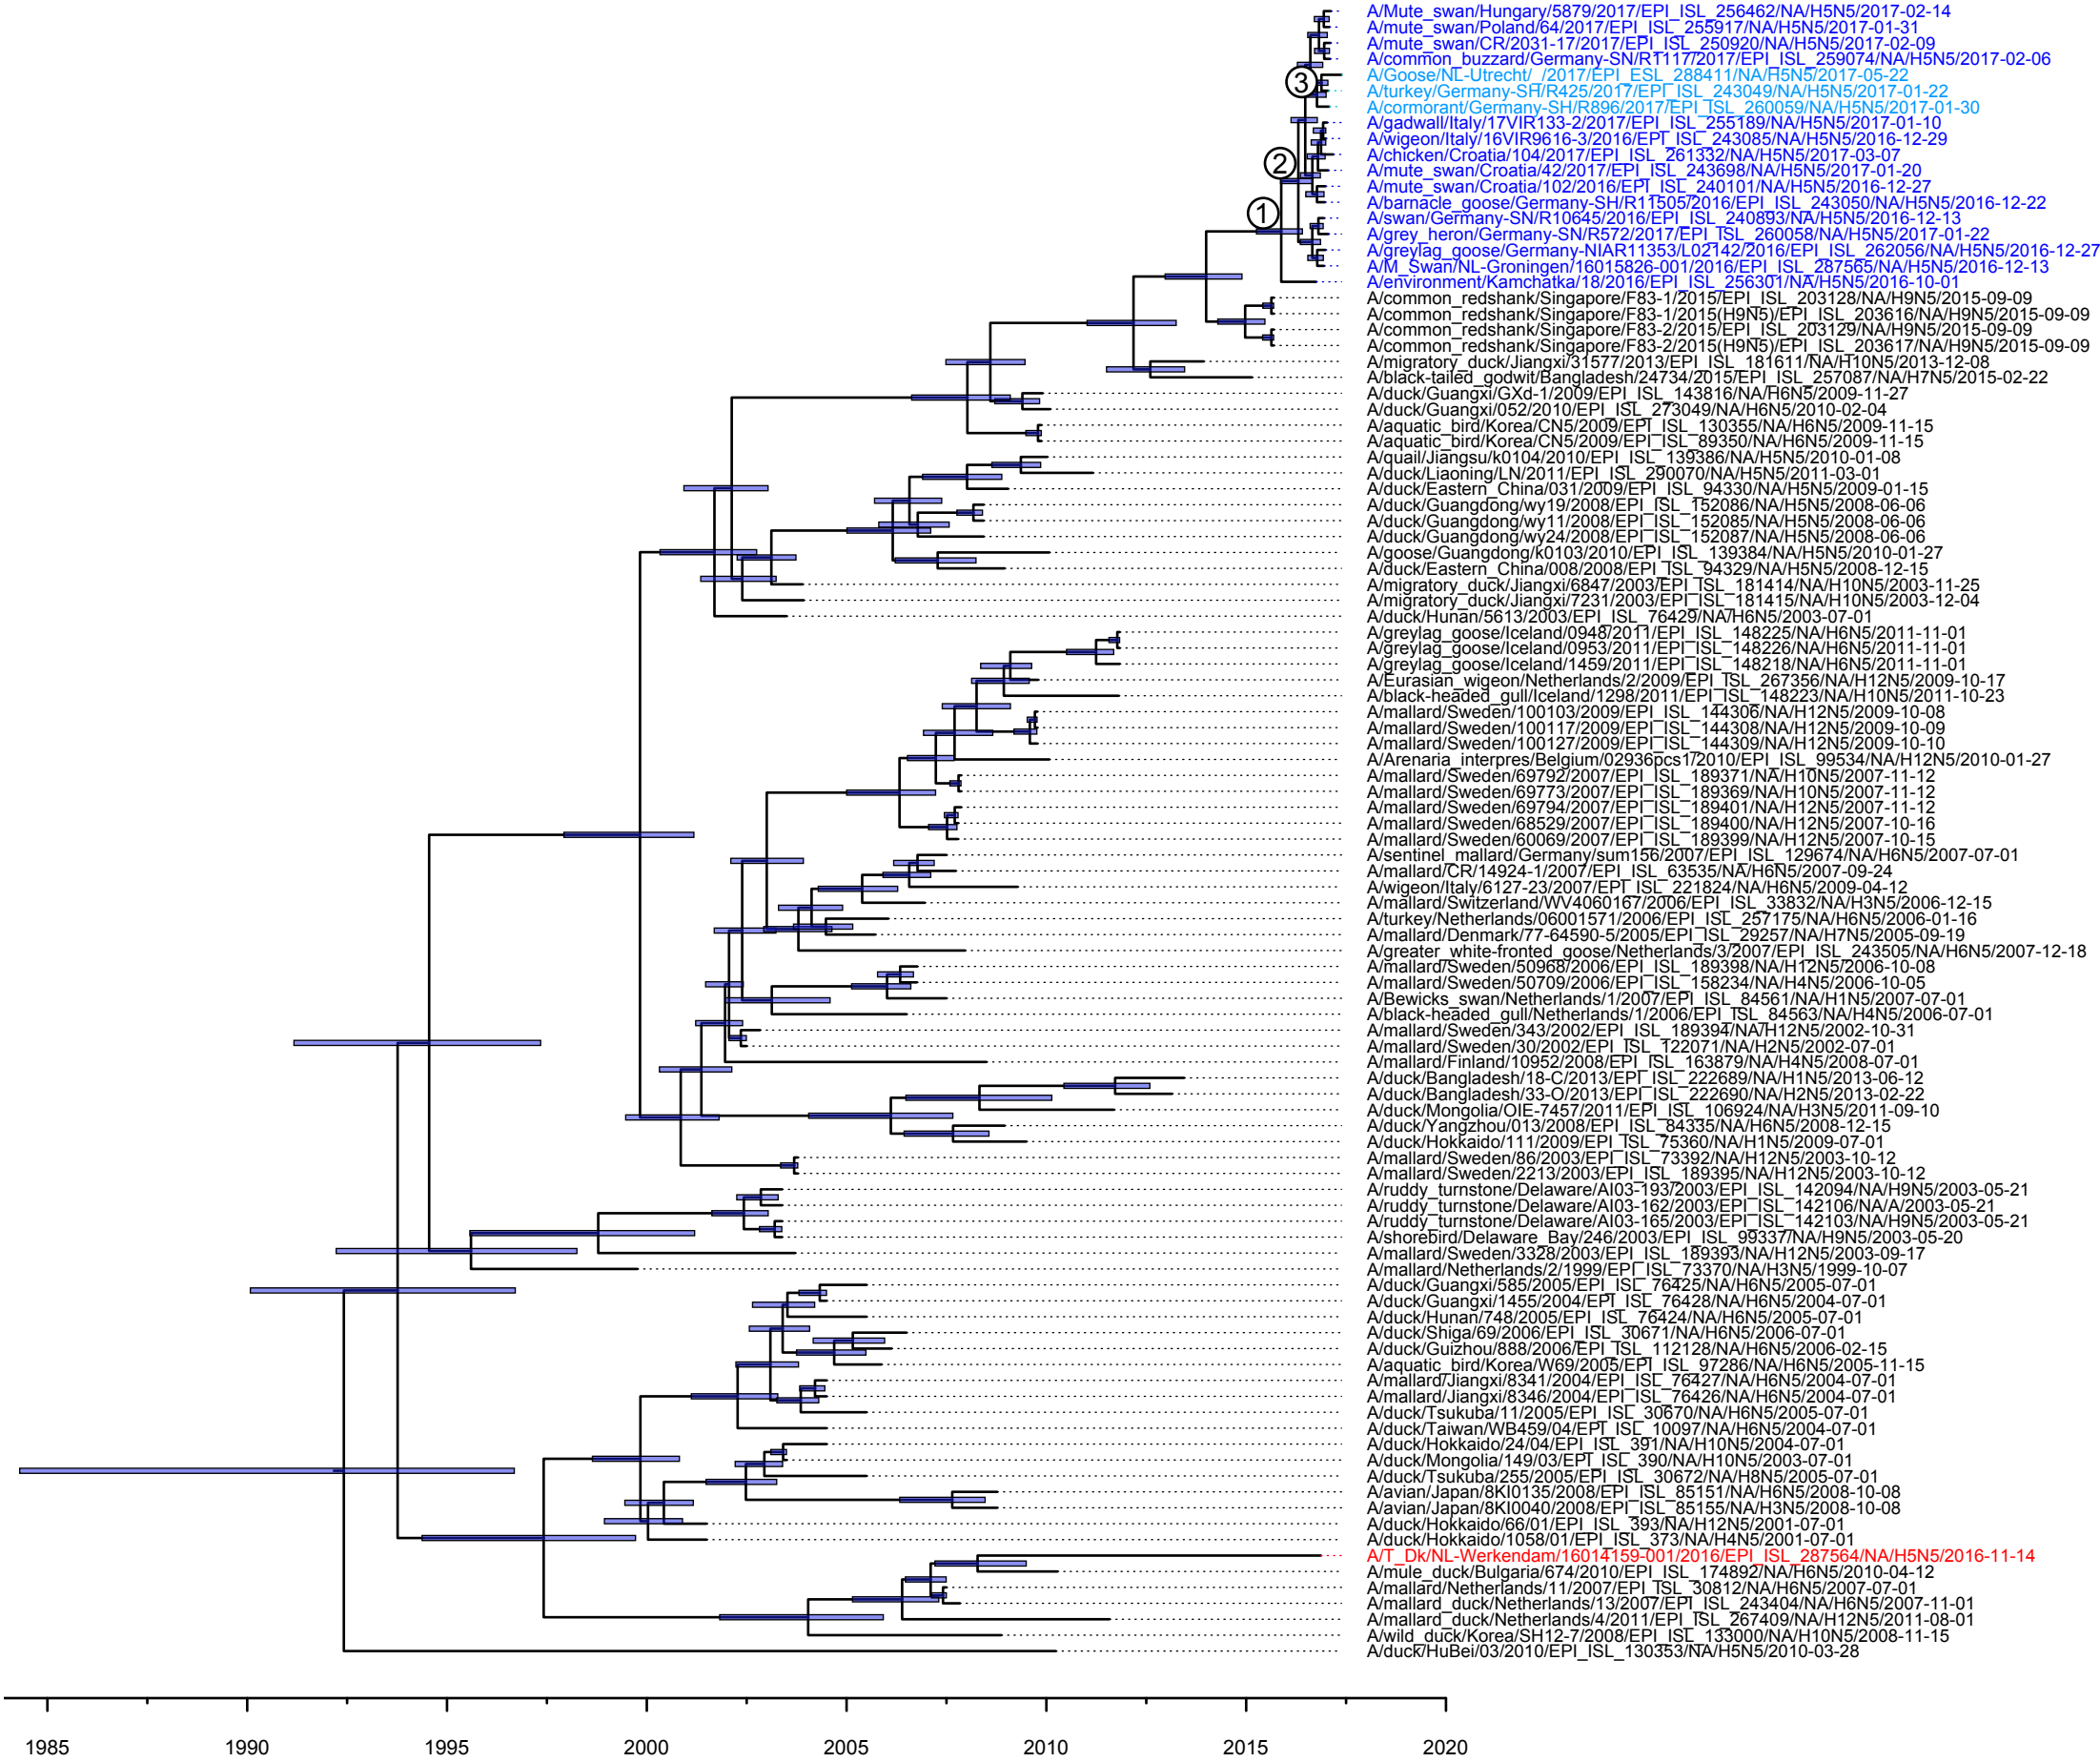



# NP H5N5-GT2

- H5N5-GT1
- H5N5-GT2
- H5N5-GT3

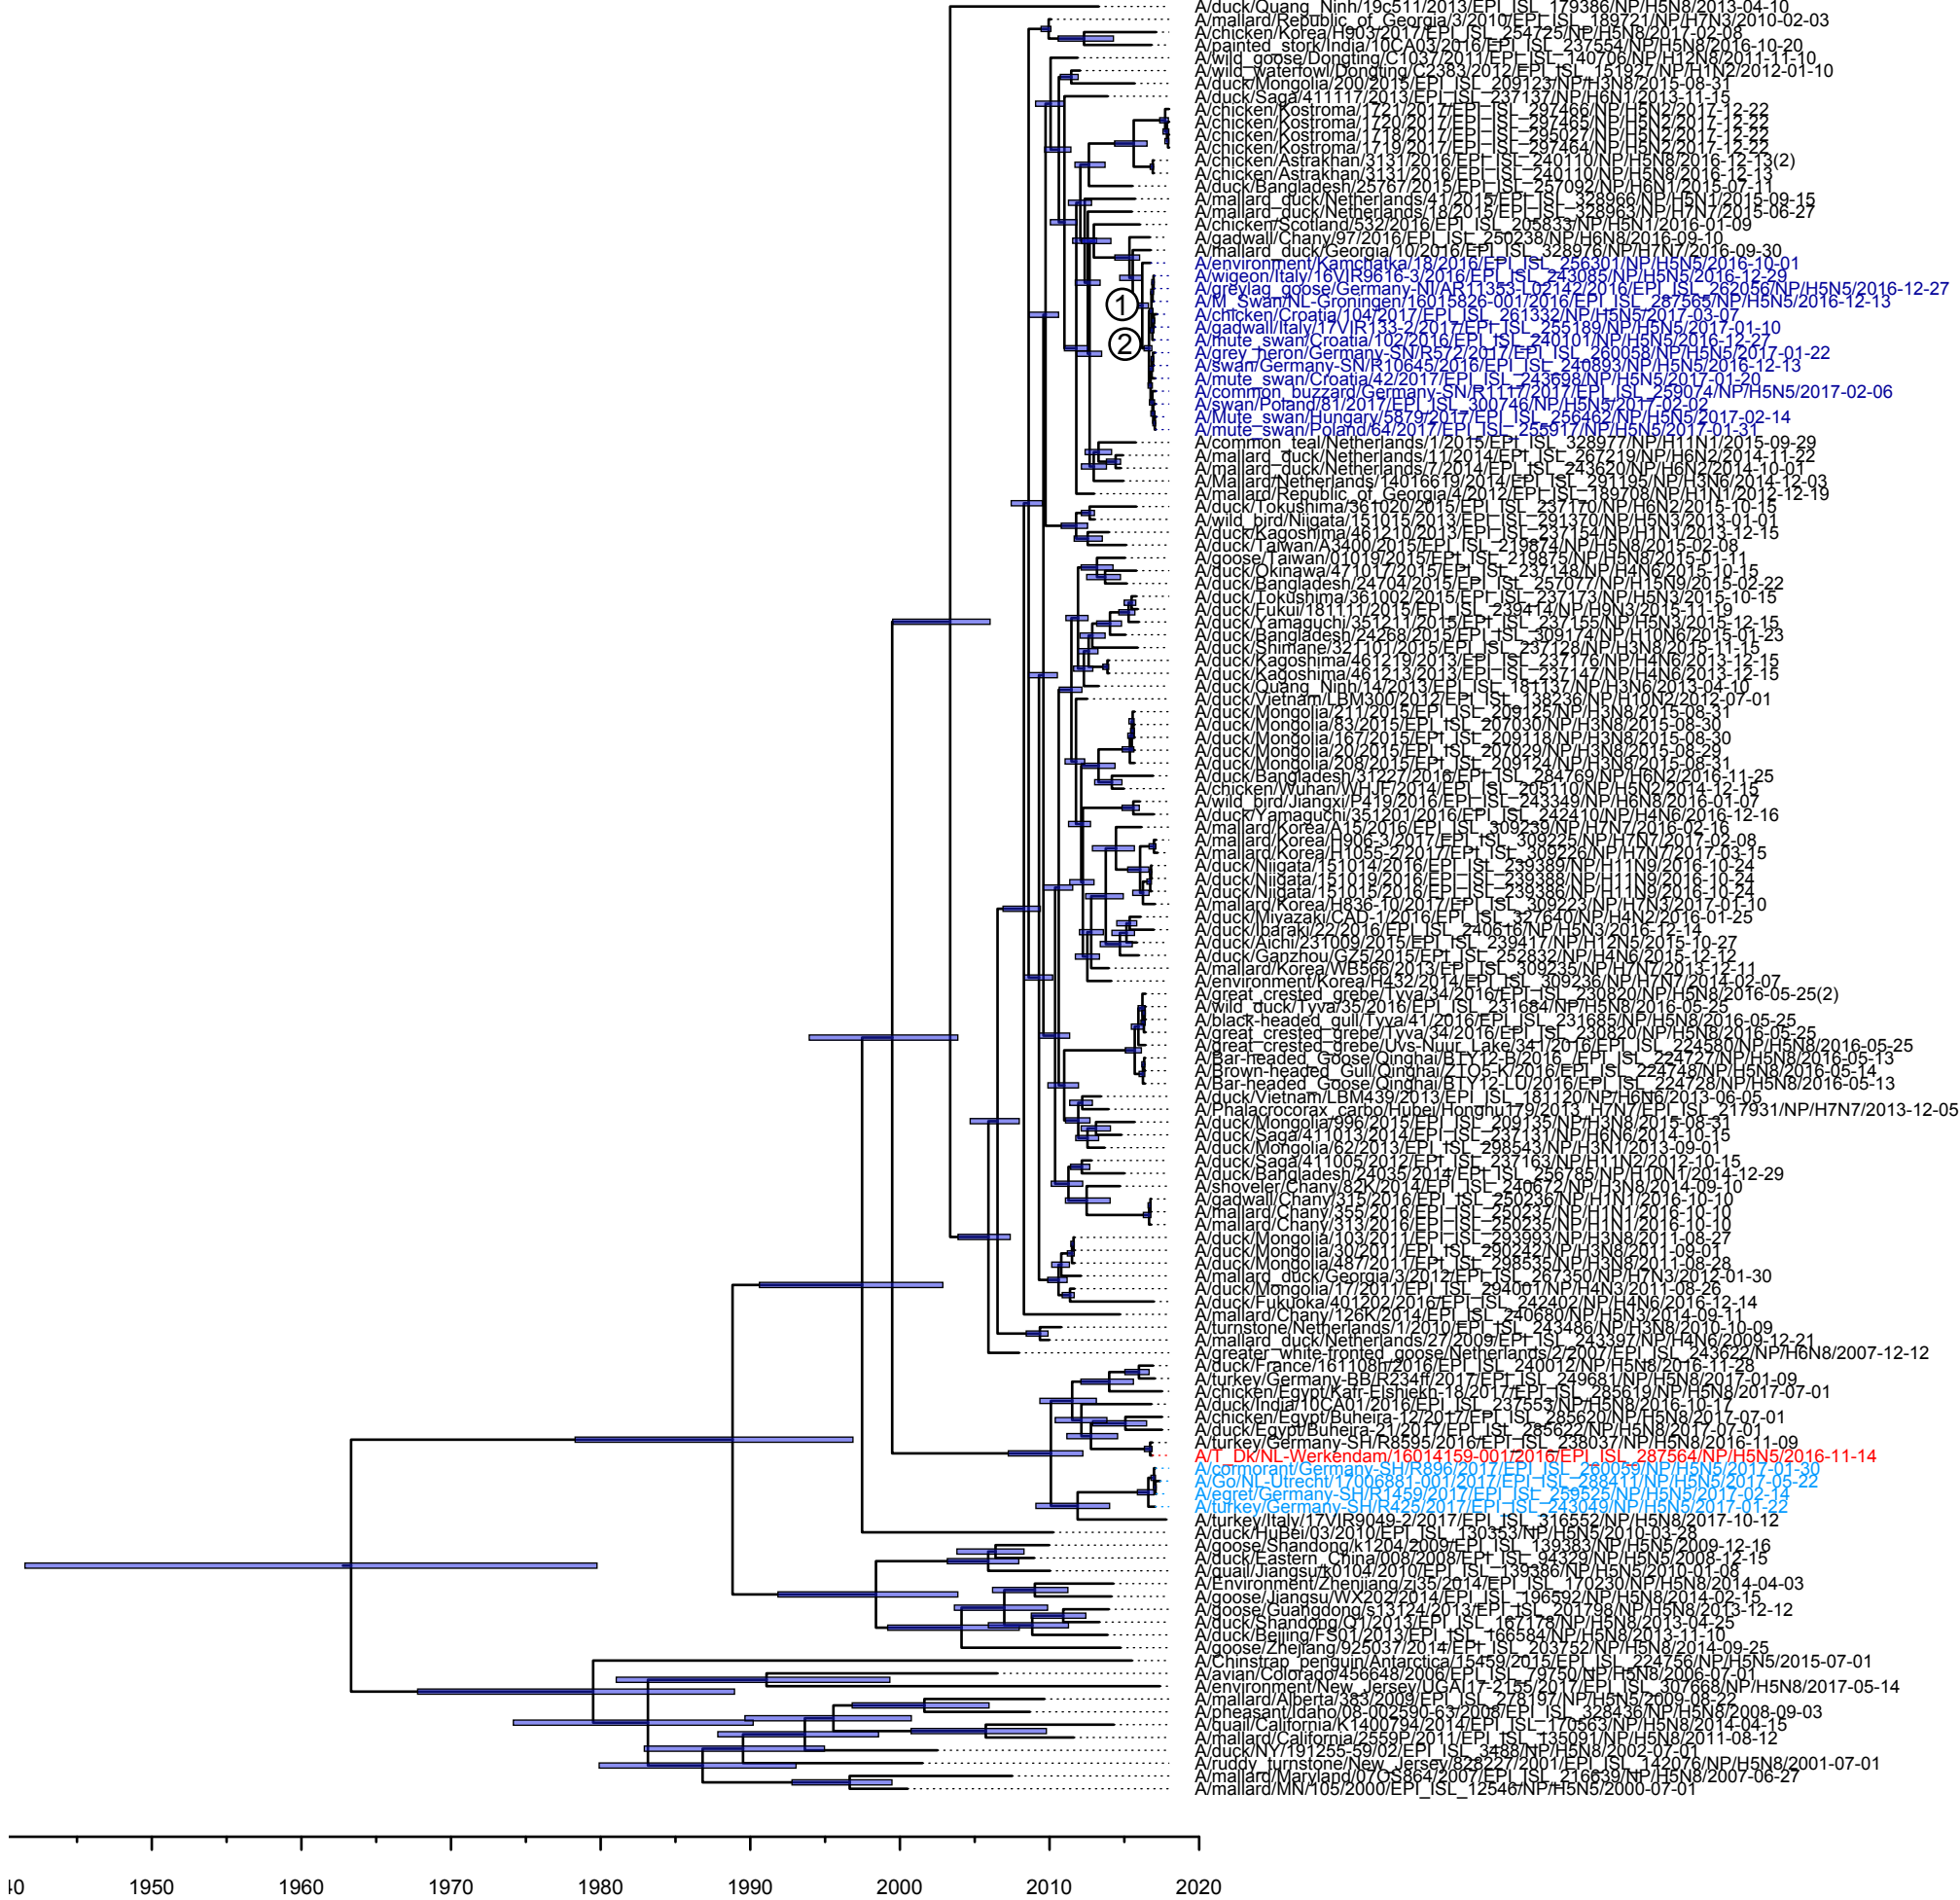



# NP H5N5-GT3

- H5N5-GT1
- H5N5-GT2
- H5N5-GT3

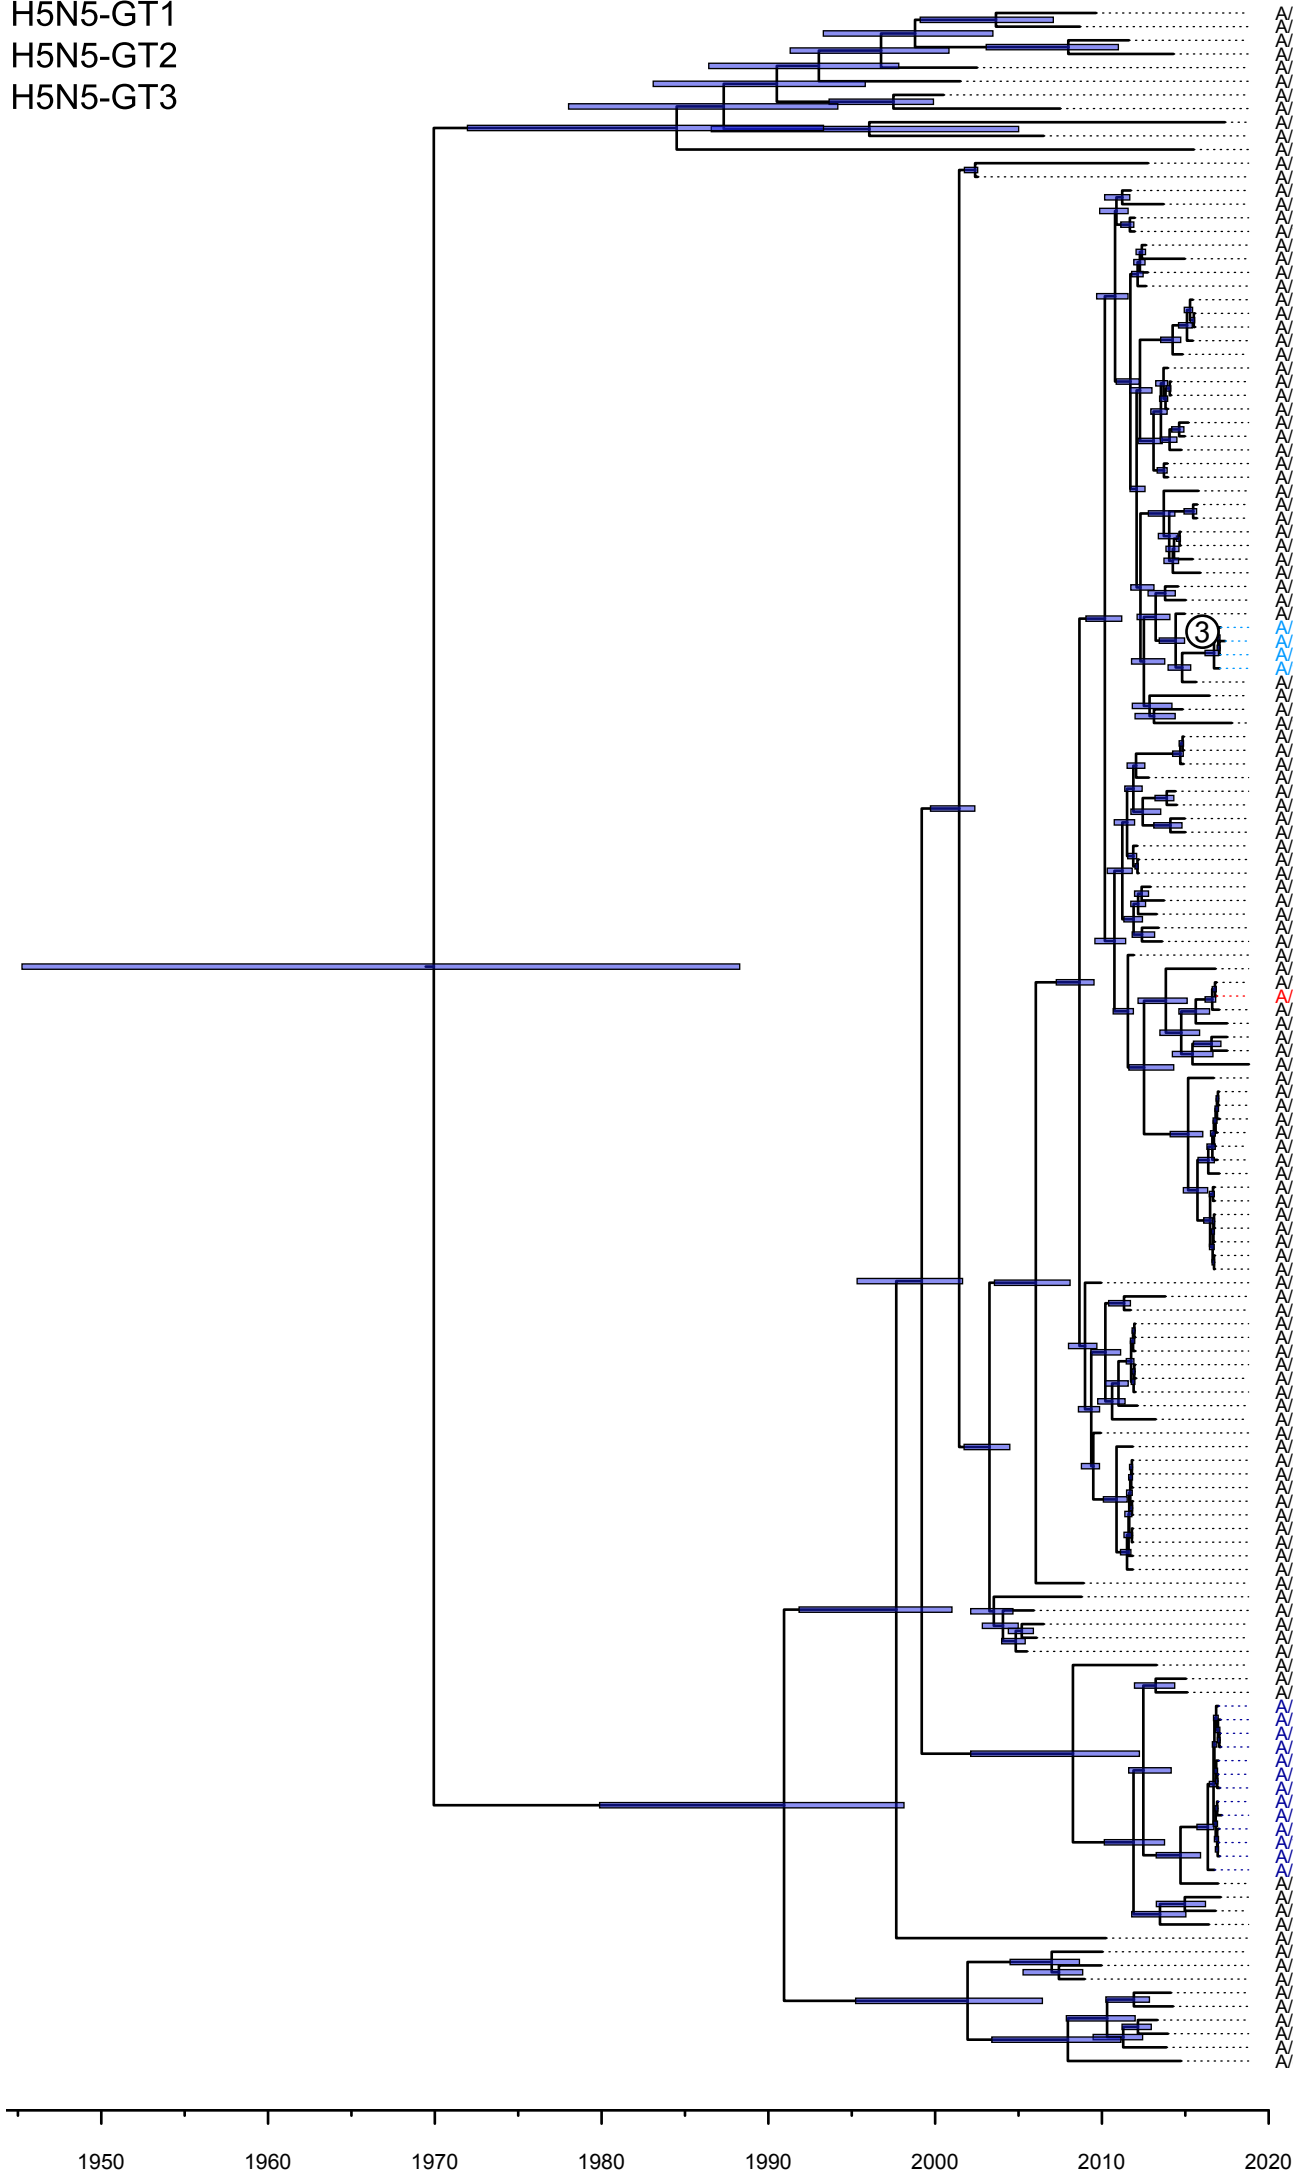

A/mallard/Alberta/383/2009/EPI\_ISL\_278197/NP/H5N5/2009-08-22  
A/pheasant/Idaho/08-002590/63/2006/EPI\_ISL\_328436/NP/H5N8/2008-09-03  
A/mallard/California/2559P/2011/EPI\_ISL\_135091/NP/H5N8/2011-08-12  
A/quail/California/K1200794/2014/EPI\_ISL\_170563/NP/H5N8/2014-04-15  
A/duck/NY/191255-59/02/EPI\_ISL\_3488/NP/H5N8/2002-07-01  
A/ruddy turnstone/New\_Jersey/82822/2001/EPI\_ISL\_142076/NP/H5N8/2001-07-01  
A/mallard/MN/105/2000/EPI\_ISL\_12546/NP/H5N5/2000-07-01  
A/mallard/Maryland/0705864/2007/EPI\_ISL\_216539/NP/H5N8/2007-06-27  
A/environment/New\_Jersey/102117-21/52/2017/EPI\_ISL\_307658/NP/H5N8/2017-05-14  
A/avian/Colorado/45649/2006/EPI\_ISL\_5570750/NP/H5N8/2006-08-17-01  
A/chinstrap penguin/Antarctica/15459/2015/EPI\_ISL\_224758/NP/H5N5/2015-07-01  
A/Caspian seal/Russia/11/2012/EPI\_ISL\_163595/NP/H5N6/2012-10-03  
A/Caspian seal/Russia/1884/2002/EPI\_ISL\_163594/NP/H5N6/2002-07-20  
A/common teal/Republic of Georgia/7/2011/EPI\_ISL\_189666/NP/H5N8/2011-09-19  
A/Italy/3/2013/EPI\_ISL\_171318/NP/H5N7/2013-09-03  
A/greater white-fronted goose/Netherlands/6/2011/EPI\_ISL\_243479/NP/H6N8/2011-12-14  
A/white-fronted goose/Netherlands/5/2011/EPI\_ISL\_267292/NP/H6N8/2011-12-14  
A/mallard duck/Netherlands/16/2013/EPI\_ISL\_266316/NP/H5N2/2012-08-17  
A/mallard duck/Netherlands/23/2012/EPI\_ISL\_243461/NP/H11N9/2012-09-27  
A/mallard duck/Netherlands/18/2012/EPI\_ISL\_267169/NP/H5N2/2012-08-21  
A/chicken/Germany/AB1385-01/1830/12/05/EPI\_ISL\_191934/NP/H5N1/2015-06-09  
A/chicken/Germany/AB1386-01/1830/12/05/EPI\_ISL\_191942/NP/H7N7/2015-07-25  
A/chicken/Germany/AR9421-01/269/2015/EPI\_ISL\_191754/NP/H7N7/2015-06-09  
A/mallard duck/Netherlands/9/2014/EPI\_ISL\_267856/NP/H6N2/2014-10-28  
A/mallard duck/Netherlands/2/2014/EPI\_ISL\_267838/NP/H10N7/2014-10-17  
A/mallard duck/Netherlands/12/2014/EPI\_ISL\_243504/NP/H10N7/2014-10-17  
A/mallard duck/Netherlands/13/2014/EPI\_ISL\_243439/NP/H10N7/2014-10-17  
A/mallard duck/Netherlands/33/2014/EPI\_ISL\_243434/NP/H10N7/2014-12-16  
A/mallard duck/Netherlands/24/2014/EPI\_ISL\_267389/NP/H7N3/2014-09-30  
A/chicken/Netherlands/13015834/2013/EPI\_ISL\_269851/NP/H5N3/2013-11-29  
A/mallard duck/Georgia/7/2016/EPI\_ISL\_303971/NP/H5N3/2013-12-10  
A/mallard duck/Netherlands/60/2015/EPI\_ISL\_328857/NP/H5N2/2015-08-12  
A/mallard duck/Netherlands/58/2015/EPI\_ISL\_328956/NP/H5N2/2015-08-09  
A/mallard duck/Netherlands/25/2014/EPI\_ISL\_243503/NP/H10N7/2014-09-19  
A/mallard duck/Netherlands/11/2015/EPI\_ISL\_328864/NP/A/2015-06-09  
A/chicken/France/150169a/2015/EPI\_ISL\_32818/NP/H5N1/2015-11-19  
A/mallard duck/Netherlands/30/2014/EPI\_ISL\_243663/NP/H5N6/2014-07-21  
A/mallard duck/Netherlands/7/2014/EPI\_ISL\_243663/NP/H5N6/2014-07-21  
A/barnacle goose/Netherlands/2/2014/EPI\_ISL\_287243/NP/H3N6/2014-12-15  
A/egret/Germany-SH/R1459/2017/EPI\_ISL\_286241/NP/H5N3/2017-05-30  
A/Go/NL-Utrecht/17006881-001/2017/EPI\_ISL\_286241/NP/H5N3/2017-05-30  
A/gormoran/Germany-SH/225886/2017/EPI\_ISL\_286241/NP/H5N3/2017-05-30  
A/mallard duck/Netherlands/56/2015/EPI\_ISL\_328958/NP/H3N2/2015-08-22  
A/chicken/Netherlands/16007311-03/041/2016/EPI\_ISL\_224531/NP/H7N9/2016-06-08  
A/mallard duck/Netherlands/8/2014/EPI\_ISL\_267186/NP/H5N2/2014-10-28  
A/turkey/Italy/17/R9049/2014/EPI\_ISL\_267186/NP/H5N2/2014-10-28  
A/chicken/Netherlands/14016059/2014/EPI\_ISL\_2409930/NP/H6N2/2014-11-22  
A/duck/Netherlands/14016396/2014/EPI\_ISL\_309835/NP/H6N2/2014-11-25  
A/duck/Netherlands/14015610/2014/EPI\_ISL\_309838/NP/H6N2/2014-11-17  
A/mallard duck/Netherlands/4/4-018250/2014/EPI\_ISL\_238197/NP/H4N6/2014-05-24  
A/chicken/Wales/600-020823/2014/EPI\_ISL\_235198/NP/H4N6/2014-06-24  
A/barnacle goose/Netherlands/1/2014/EPI\_ISL\_243520/NP/H6N8/2014-12-15  
A/black-headed gull/Netherlands/2001005/2012/EPI\_ISL\_309809/NP/H10N9/2012-02-06  
A/turkey/Netherlands/12005615/2012/EPI\_ISL\_309826/NP/H10N9/2012-03-13  
A/turkey/Netherlands/12004763-001/004/2012/EPI\_ISL\_309825/NP/H10N9/2012-03-05  
A/mallard duck/Netherlands/2/2013/EPI\_ISL\_2435197/NP/H11N/2013-09-16  
A/mallard duck/Netherlands/23/2013/EPI\_ISL\_267197/NP/H11N/2013-04-09  
A/mallard duck/Netherlands/31/2013/EPI\_ISL\_243453/NP/H10N7/2013-05-20  
A/mallard duck/Netherlands/32/2013/EPI\_ISL\_243453/NP/H10N7/2013-05-20  
A/duck/India/10CA03/2018/EPI\_ISL\_237553/NP/H5N8/2016-10-11  
A/turkey/Germany-SH/R8595/2016/EPI\_ISL\_238037/NP/H5N8/2016-11-09  
A/DP/NL-Werkendam/18014159-001/2016/EPI\_ISL\_287564/NP/H5N5/2016-11-14  
A/chicken/Voronezh/18/2017/EPI\_ISL\_285619/NP/H5N8/2017-07-01  
A/duck/Egypt/Buheira-21/2017/EPI\_ISL\_285622/NP/H5N8/2017-07-01  
A/chicken/Egypt/Buheira-12/2017/EPI\_ISL\_285620/NP/H5N8/2017-07-01  
A/qadwall/Cyprus/189/2016/EPI\_ISL\_333633/NP/H3N8/2016-09-19  
A/Harris Hawk/Hungary/120/2017/EPI\_ISL\_255191/NP/H5N8/2017-01-02  
A/mute swan/Hungary/119/2017/EPI\_ISL\_255190/NP/H5N8/2017-01-02  
A/turkey/Hungary/2030/2017/EPI\_ISL\_255398/NP/H5N8/2017-01-16  
A/mute swan/Hungary/5/049/2016/EPI\_ISL\_237730/NP/H5N8/2016-10-19  
A/duck/France/161108p/2016/EPI\_ISL\_240012/NP/H5N9/2016-11-28  
A/turkey/Germany-BB/R2341/2017/EPI\_ISL\_240681/NP/H5N8/2017-01-09  
A/mallard duck/Georgia/9/2016/EPI\_ISL\_338895/NP/H4N8/2016-09-30  
A/mallard duck/Georgia/8/2016/EPI\_ISL\_338896/NP/H4N8/2016-09-30  
A/mallard duck/Georgia/3/2016/EPI\_ISL\_338897/NP/H4N8/2016-09-30  
A/mallard duck/Georgia/4/2016/EPI\_ISL\_338898/NP/H4N8/2016-09-30  
A/mallard duck/Georgia/7/2016/EPI\_ISL\_338899/NP/H4N8/2016-09-30  
A/greater white-fronted goose/Netherlands/11/2009/EPI\_ISL\_243490/NP/H6N1/2009-12-09  
A/mallard duck/Netherlands/9/2013/EPI\_ISL\_243515/NP/H6N8/2013-09-16  
A/mallard duck/Netherlands/40/2011/EPI\_ISL\_267275/NP/H5N1/2011-12-24  
A/mallard duck/Netherlands/43/2011/EPI\_ISL\_243380/NP/H5N1/2011-12-24  
A/mallard duck/Netherlands/45/2011/EPI\_ISL\_267243/NP/H5N1/2011-12-24  
A/mallard duck/Netherlands/31/2012/EPI\_ISL\_243400/NP/H5N1/2012-01-10  
A/mallard duck/Netherlands/48/2012/EPI\_ISL\_267433/NP/H5N1/2012-01-10  
A/common teal/Netherlands/1300166/2002/EPI\_ISL\_269829/NP/H5N4/2012-02-12  
A/mallard duck/Netherlands/23/2009/EPI\_ISL\_243668/NP/H6N1/2009-12-01  
A/greylag goose/Iceland/1459/2017/EPI\_ISL\_148218/NP/H6N8/2011-11-01  
A/greylag goose/Iceland/0926/2017/EPI\_ISL\_148224/NP/H6N8/2011-11-01  
A/greylag goose/Iceland/0821/2017/EPI\_ISL\_148222/NP/H6N8/2011-11-01  
A/pink-footed goose/Iceland/0987/2011/EPI\_ISL\_148230/NP/H6N8/2011-11-01  
A/greylag goose/Iceland/0961/2017/EPI\_ISL\_148227/NP/H6N8/2011-11-01  
A/greylag goose/Iceland/0976/2017/EPI\_ISL\_148228/NP/H6N8/2011-11-01  
A/greylag goose/Iceland/0980/2017/EPI\_ISL\_148228/NP/H6N8/2011-11-01  
A/greylag goose/Iceland/1482/2017/EPI\_ISL\_148220/NP/H6N8/2011-11-01  
A/mallard Sweden/80415/2008/EPI\_ISL\_68367/NP/A/2008-10-08  
A/mallard duck/Netherlands/6/2005/EPI\_ISL\_239036/NP/H5N2/2005-11-25  
A/Eurasian wigeon/Netherlands/1/2006/EPI\_ISL\_30804/NP/H3N8/2006-07-01  
A/greater white-fronted goose/Netherlands/4/2006/EPI\_ISL\_23599/NP/H6N8/2006-01-27  
A/black-headed gull/Netherlands/1/2006/EPI\_ISL\_30809/NP/H6N8/2006-07-01  
A/goose/Taiwan/01019/2015/EPI\_ISL\_219875/NP/H5N8/2015-01-14  
A/duck/Taiwan/A3400/2015/EPI\_ISL\_219874/NP/H5N8/2015-02-08  
A/mute swan/Croatia/102/2016/EPI\_ISL\_240101/NP/H5N5/2016-12-27  
A/common buzzard/Germany-NI/AR1353-102/2016/EPI\_ISL\_282056/NP/H5N5/2016-12-06  
A/mute swan/Poland/64/2017/EPI\_ISL\_255917/NP/H5N5/2017-01-31  
A/mute swan/Hungary/5879/2017/EPI\_ISL\_256452/NP/H5N5/2017-02-14  
A/greylag goose/Germany-NI/AR1353-102/2016/EPI\_ISL\_282056/NP/H5N5/2016-12-27  
A/swan/Germany-SH/R10845/2016/EPI\_ISL\_240808/NP/H5N5/2017-01-22  
A/grey heron/Germany-SH/R35/2016/EPI\_ISL\_287565/NP/H5N5/2016-12-13  
A/mute swan/NL-Groningen/16015826-001/2018/EPI\_ISL\_287565/NP/H5N5/2016-12-13  
A/chicken/Croatia/104/2017/EPI\_ISL\_281332/NP/H5N5/2017-03-07  
A/qadwall/Italy/16VR616-2/2017/EPI\_ISL\_253081/NP/H5N8/2016-01-10  
A/wigeon/Italy/16VR616-2/2017/EPI\_ISL\_253081/NP/H5N8/2016-01-10  
A/mute swan/Croatia/42/2017/EPI\_ISL\_243698/NP/H5N5/2017-01-20  
A/environment/Kamchatka/18/2016/EPI\_ISL\_256301/NP/H5N5/2016-10-01  
A/chicken/Astrakhan/3/31/2018/EPI\_ISL\_230710/NP/H5N8/2016-12-13  
A/chicken/Korea/H9/2018/EPI\_ISL\_230710/NP/H5N8/2016-12-13  
A/painted stork/India/10CA03/2018/EPI\_ISL\_237553/NP/H5N8/2016-10-20  
A/great crested grebe/Lyva/34/2016/EPI\_ISL\_230820/NP/H5N8/2016-05-25  
A/duck/HuBei/03/2010/EPI\_ISL\_130333/NP/H5N5/2010-01-08  
A/quail/Jiangsu/K104/2010/EPI\_ISL\_130333/NP/H5N5/2010-01-08  
A/goose/Shandong/K1204/2009/EPI\_ISL\_139383/NP/H5N5/2009-12-16  
A/duck/Eastern China/008/2008/EPI\_ISL\_94329/NP/H5N5/2008-12-15  
A/goose/Jiangsu/WX202/2014/EPI\_ISL\_195592/NP/H5N8/2014-02-15  
A/environment/Zhejiang/135/2015/EPI\_ISL\_167187/NP/H5N8/2015-04-03  
A/goose/Guangdong/13124/2013/EPI\_ISL\_201798/NP/H5N8/2013-12-12  
A/duck/Beijing/FS01/2013/EPI\_ISL\_166584/NP/H5N8/2013-11-10  
A/goose/Zhejiang/925037/2014/EPI\_ISL\_203752/NP/H5N8/2014-09-25

# MP

- H5N5-GT1
- H5N5-GT2
- H5N5-GT3

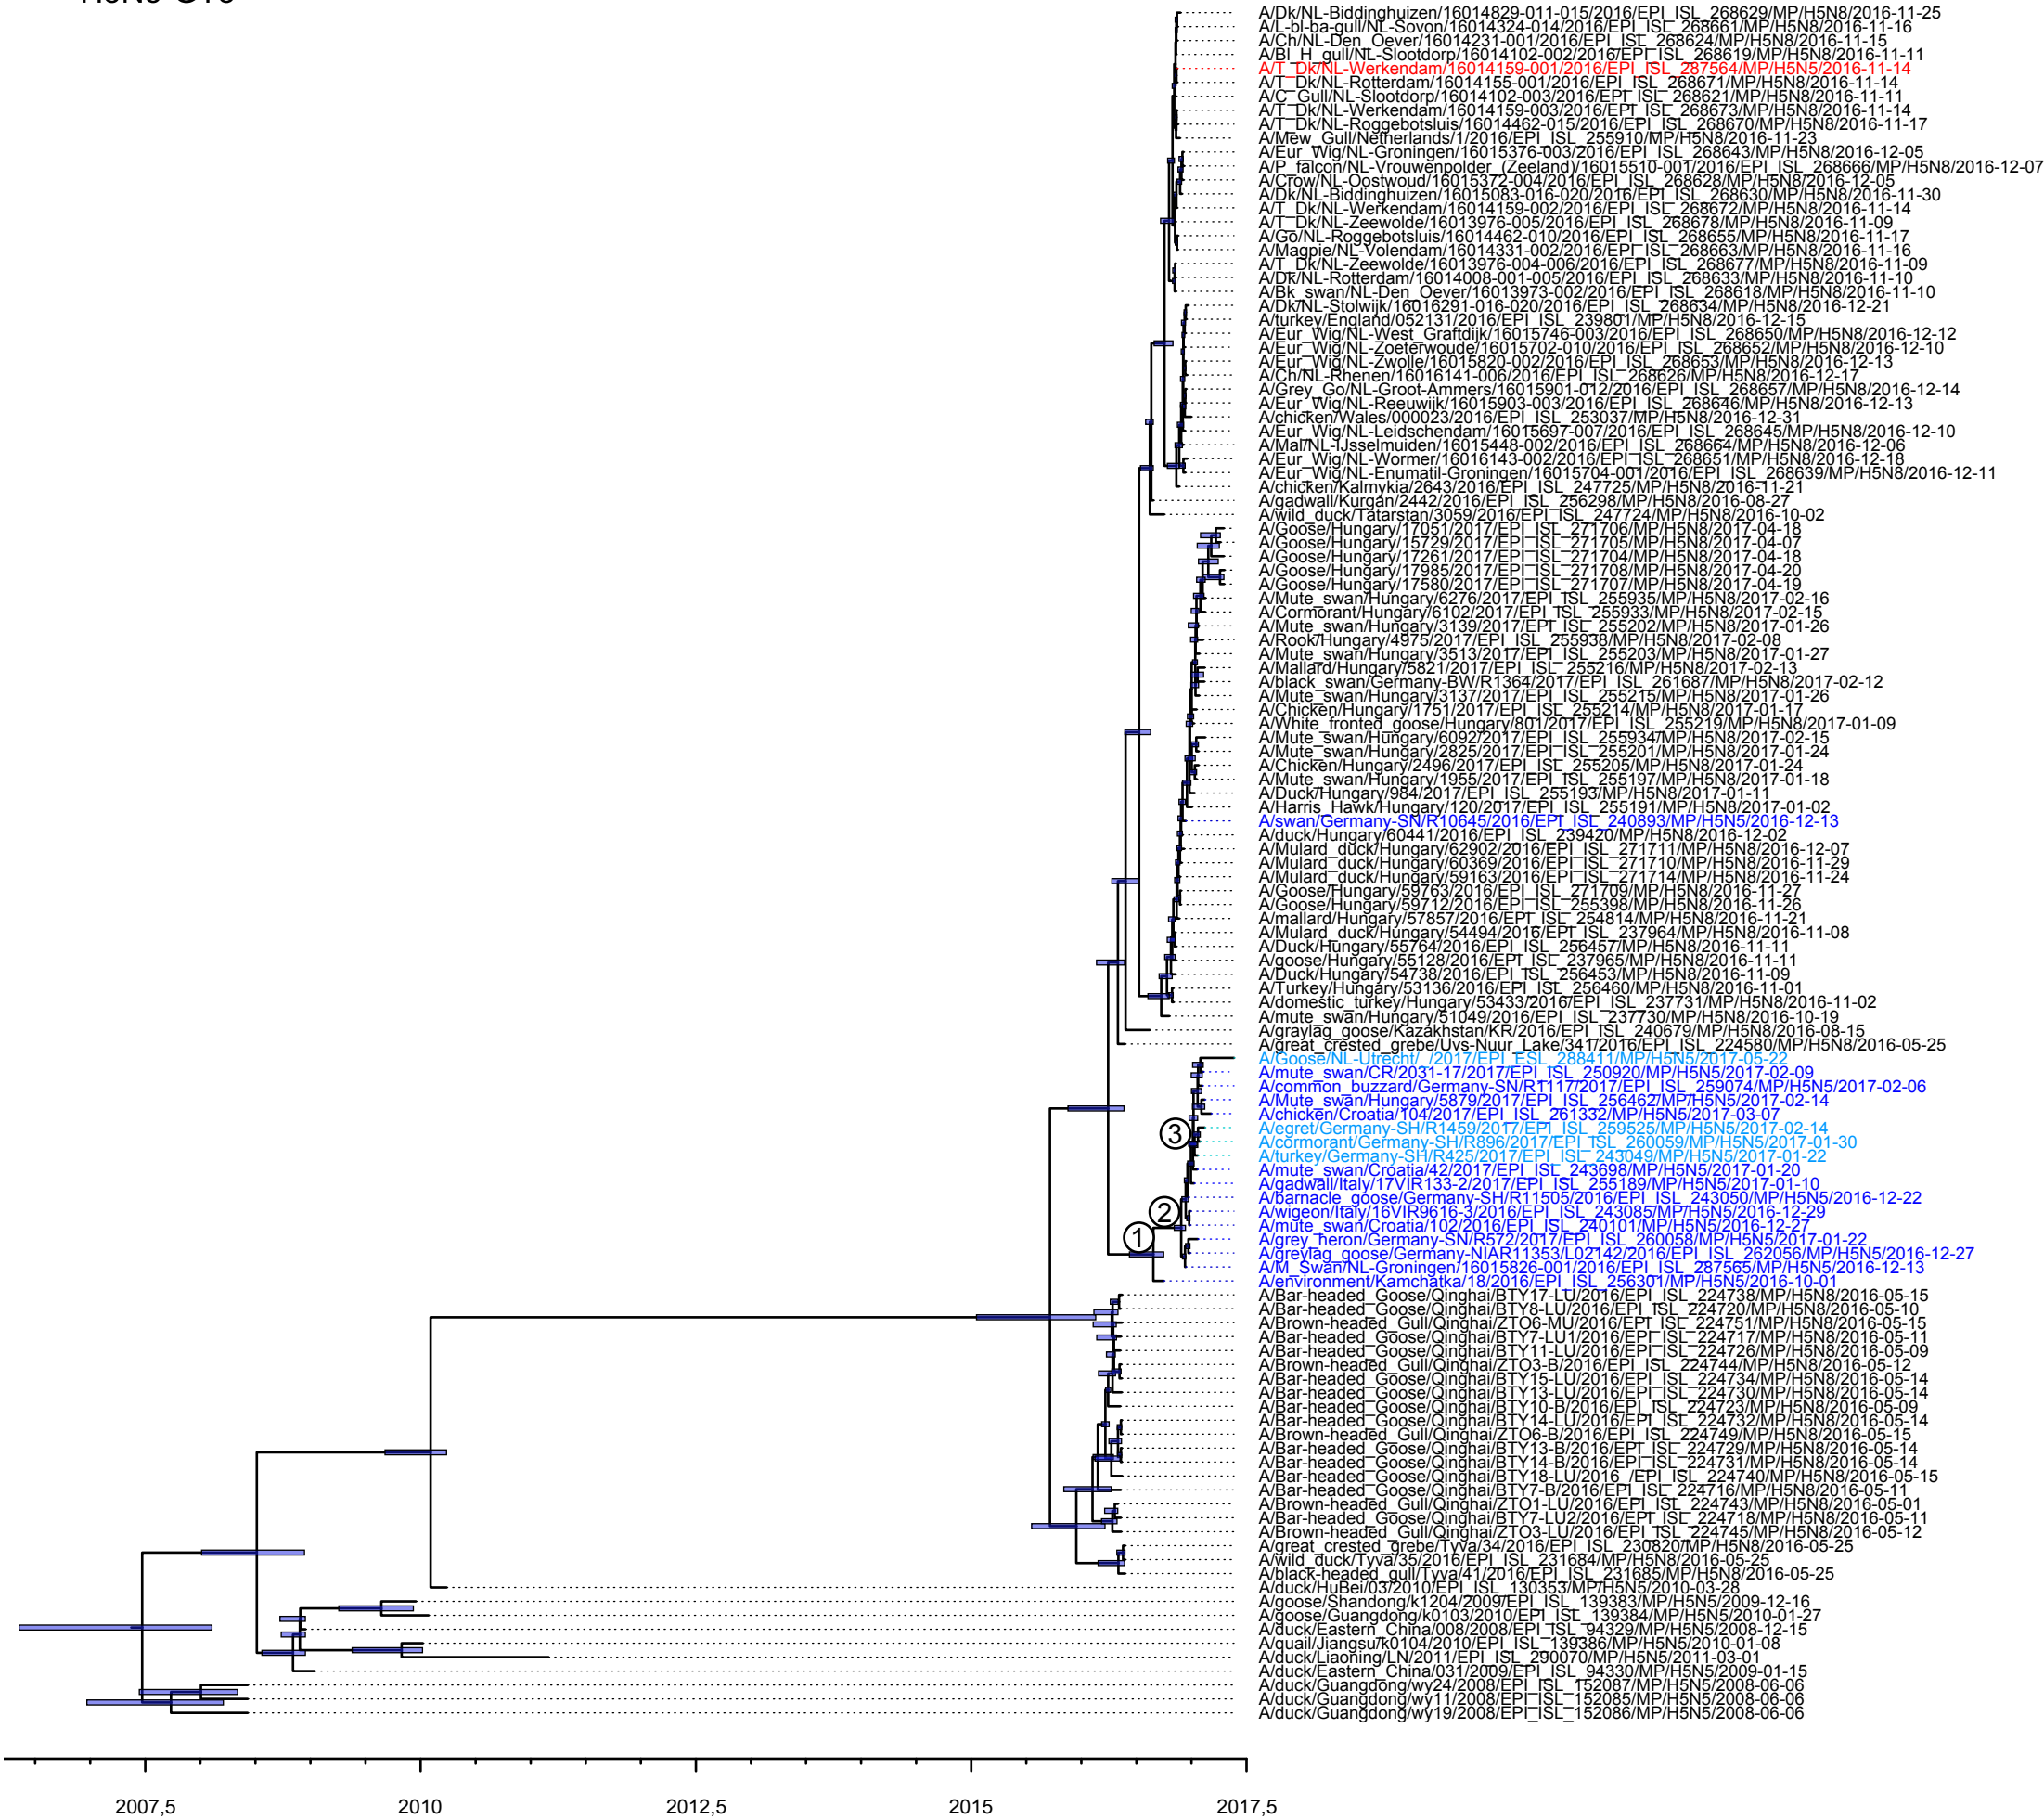



# NS

- H5N5-GT1
- H5N5-GT2
- H5N5-GT3

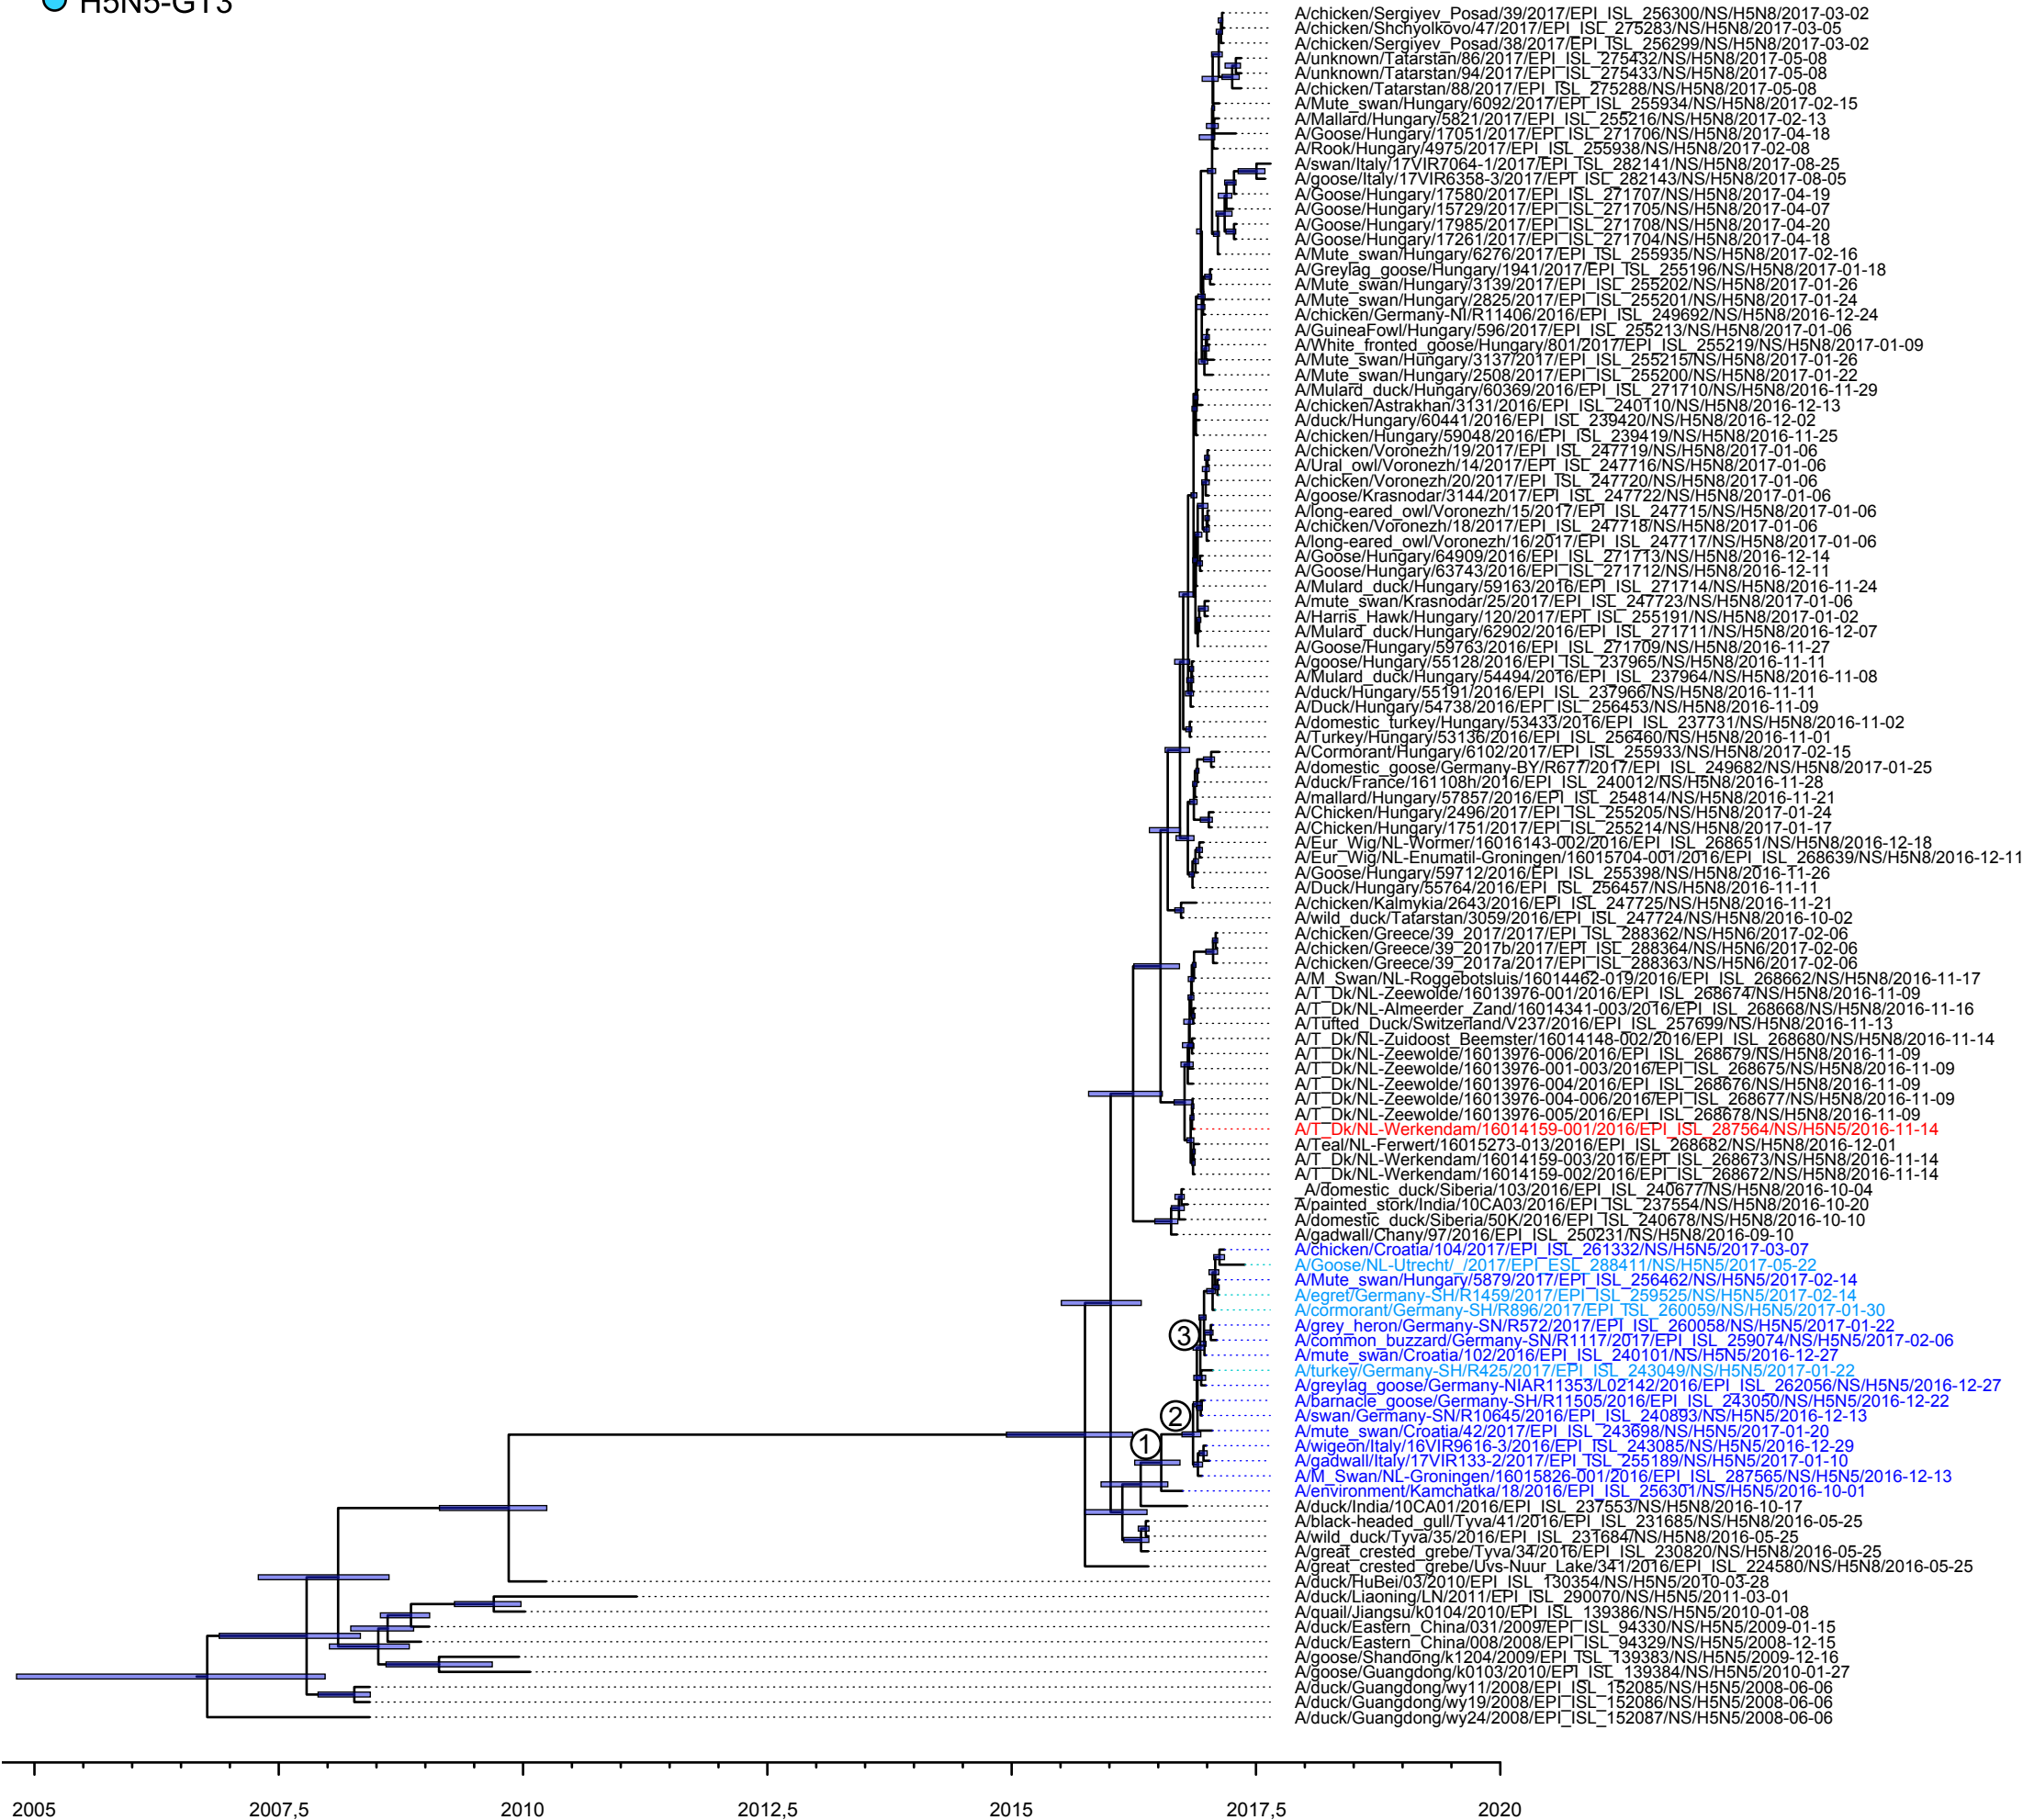

Supplement: s1 [file s1]
