# Supplementary material for: Spread of Highly Pathogenic Avian Influenza (HPAI) H5N5 Viruses in Europe in 2016–2017 Appears Related to the Timing of Reassortment Events
Source: MDPI journal article supplement (doi:10.3390/v11060501), 2019-05-31
Supplement: s1 [file s1]

**Table S5. LPAI ancestor viruses of reassortant genes.** Novel genes were obtained by reassortment of the (HPAI) H5N5 genotypes detected during the HPAI H5 2016-2017 epizootic (H5N5-GT1, H5N5-GT2 and H5N5-GT3) with co-circulating low pathogenic avian influenza (LPAI) ancestor viruses. The most closely related LPAI ancestor viruses were identified by BLAST in the GISAID's EpiFlu™ Database (<http://www.gisaid.org>) on 10 May 2019.

| Genotype | Gene | Most closely related virus          | Subtype | GISAID isolate ID | Nucleotide sequence identity |
|----------|------|-------------------------------------|---------|-------------------|------------------------------|
| H5N5-GT1 | PA   | A/duck/Mongolia/17/2011             | H4N3    | EPI_ISL_294001    | 2174/2209 (98%)              |
|          | NA   | A/Mallard duck/Sweden/139899/2012   | H15N5   | EPI_ISL_267231    | 1410/1442 (97%)              |
| H5N5-GT2 | PB2  | A/Barnacle goose/Netherlands/2/2014 | H3N6    | EPI_ISL_267243    | 2294/2316 (99%)              |
|          | PB1  | A/Duck/Mongolia/709/2015            | H10N7   | EPI_ISL_206696    | 2288/2316 (98%)              |
|          | NP   | A/Mallard duck/Netherlands/7/2014   | H6N2    | EPI_ISL_243620    | 1519/1540 (98%)              |
|          | NA   | A/duck/Kyoto/261007/2014            | H6N5    | EPI_ISL_237150    | 1418/1439 (98%)              |
| H5N5-GT3 | PB1  | A/mallard duck/Netherlands/9/2014   | H6N2    | EPI_ISL_267352    | 2279/2316 (98%)              |
|          | NP   | /Barnacle goose/Netherlands/2/2014  | H3N6    | EPI_ISL_267243    | 1525/1540 (99%)              |

PB2, polymerase basic protein 2; PB1, polymerase basic protein 1; NP, nucleoprotein; NA, neuraminidase.
