# Supplementary material for: Spread of Highly Pathogenic Avian Influenza (HPAI) H5N5 Viruses in Europe in 2016–2017 Appears Related to the Timing of Reassortment Events
Source: MDPI journal article supplement (doi:10.3390/v11060501), 2019-05-31
Supplement: s1 [file s1]

**Table S1. Viruses most closely related to the newly isolated H5N5 strain.** Genetically most closely related viruses to the newly isolated highly pathogenic avian influenza (HPAI) H5N5-GT3 virus strain (A/Go/NL-Utrecht/17006881-001/2017; H5N5-19) as identified for each gene segment by BLAST in the GISAID's EpiFlu™ Database (<http://www.gisaid.org>) on 10 May 2019.

| Gene | Most closely related virus              | Subtype | GISAID isolate ID | Nucleotide sequence identity |
|------|-----------------------------------------|---------|-------------------|------------------------------|
| PB2  | A/M_Swan/NL-Groningen/16015826-001/2016 | H5N5    | EPI_ISL_287565    | 2311/2316 (99.8%)            |
| PB1  | A/egret/Germany-SH/R1459/2017           | H5N5    | EPI_ISL_259525    | 2281/2286 (99.8%)            |
| PA   | A/M_Swan/NL-Groningen/16015826-001/2016 | H5N5    | EPI_ISL_287565    | 2203/2208 (99.8%)            |
|      | A/Mute_swan/Hungary/5879/2017           | H5N5    | EPI_ISL_256462    |                              |
| HA   | A/M_Swan/NL-Groningen/16015826-001/2016 | H5N5    | EPI_ISL_287565    | 1746/1751 (99.7%)            |
| NP   | A/cormorant/Germany-SH/R896/2017        | H5N5    | EPI_ISL_260059    | 1507/1507 (100.0%)           |
|      | A/egret/Germany-SH/R1459/2017           | H5N5    | EPI_ISL_259525    |                              |
| NA   | A/M_Swan/NL-Groningen/16015826-001/2016 | H5N5    | EPI_ISL_287565    | 1434/1441 (99.5%)            |
|      | A/Mute_swan/Hungary/5879/2017           | H5N5    | EPI_ISL_256462    |                              |
| MP   | A/Mute_swan/Hungary/5879/2017           | H5N5    | EPI_ISL_256462    | 1002/1002 (100.0%)           |
| NS   | A/cormorant/Germany-SH/R896/2017        | H5N5    | EPI_ISL_260059    | 864/865 (99.9%)              |
|      | A/egret/Germany-SH/R1459/2017           | H5N5    | EPI_ISL_259525    |                              |
|      | A/Mute_swan/Hungary/5879/2017           | H5N5    | EPI_ISL_256462    |                              |

PB2, polymerase basic protein 2; PB1, polymerase basic protein 1; PA, polymerase acidic protein; HA, hemagglutinin; NP, nucleoprotein; NA, neuraminidase; MP, matrix protein; NS, nonstructural protein
