# Supplementary material for: Spread of Highly Pathogenic Avian Influenza (HPAI) H5N5 Viruses in Europe in 2016–2017 Appears Related to the Timing of Reassortment Events
Source: MDPI journal article supplement (doi:10.3390/v11060501), 2019-05-31
Supplement: s1 [file s1]

**Table S2. Detailed information on H5N5 virus sequences.** Sequences of highly pathogenic avian influenza (HPAI) H5N5 viruses used in this study as listed in the GISAID's EpiFlu™ Database. We gratefully acknowledge the authors, originating and submitting laboratories of the sequences from GISAID's EpiFlu™ Database on which this research is based. All submitters of data may be contacted directly via the GISAID website (<http://www.gisaid.org>).

| Short isolate name | Full isolate name                                 | Bird species        | Collection date | Collection location | Submitting laboratory                                                                              | GISAID isolate ID |
|--------------------|---------------------------------------------------|---------------------|-----------------|---------------------|----------------------------------------------------------------------------------------------------|-------------------|
| H5N5-1             | A/T_Dk/NL-Werkendam/16014159-001/2016             | Tufted duck         | 2016-11-14      | Netherlands         | Wageningen Bioveterinary Research<br>State Research Center of Virology and<br>Biotechnology VECTOR | EPI_ISL_287564    |
| H5N5-2             | A/Environment/Kamchatka/18/2016                   | Environment         | 2016-10-01      | Russia              |                                                                                                    | EPI_ISL_256301    |
| H5N5-3             | A/Swan/Germany-SN/R10645/2016                     | Swan                | 2016-12-13      | Germany             | Friedrich-Loeffler-Institut                                                                        | EPI_ISL_240893    |
| H5N5-4             | A/M_Swan/NL-Groningen/16015826-001/2016           | Mute swan           | 2016-12-13      | Netherlands         | Wageningen Bioveterinary Research                                                                  | EPI_ISL_287565    |
| H5N5-5             | A/Barnacle goose/Germany-SH/R11505/2016           | Barnacle goose      | 2016-12-22      | Germany             | Friedrich-Loeffler-Institut                                                                        | EPI_ISL_243050    |
| H5N5-6             | A/Greylag goose/Germany-NIAR11353-L02142/2016     | Greylag goose       | 2016-12-27      | Germany             | Friedrich-Loeffler-Institut                                                                        | EPI_ISL_262056    |
| H5N5-7             | A/Mute swan/Croatia/102/2016                      | Mute swan           | 2016-12-27      | Croatia             | Croatian Veterinary Institute                                                                      | EPI_ISL_240101    |
| H5N5-8             | A/Wigeon/Italy/16VIR9616-3/2016                   | Wigeon              | 2016-12-29      | Italy               | Istituto Zooprofilattico Sperimentale<br>Delle Venezie                                             | EPI_ISL_243085    |
| H5N5-9             | A/Gadwall/Italy/17VIR133-2/2017                   | Gadwall             | 2017-01-10      | Italy               | Istituto Zooprofilattico Sperimentale<br>Delle Venezie                                             | EPI_ISL_255189    |
| H5N5-10            | A/Mute swan/Croatia/42/2017                       | Mute swan           | 2017-01-20      | Croatia             | Croatian Veterinary Institute                                                                      | EPI_ISL_243698    |
| H5N5-11            | A/Grey heron/Germany-SN/R572/2017                 | Grey heron          | 2017-01-22      | Germany             | Friedrich-Loeffler-Institut                                                                        | EPI_ISL_260058    |
| H5N5-12            | A/Mute swan/Poland/64/2017                        | Mute swan           | 2017-01-31      | Poland              | National Veterinary Research Institut<br>Poland                                                    | EPI_ISL_255917    |
| H5N5-13            | A/Common buzzard/Germany-SN/R1117/2017            | Common buzzard      | 2017-02-06      | Germany             | Friedrich-Loeffler-Institut<br>Central Agricultural Office Veterinary<br>Diagnostic Directorate    | EPI_ISL_259074    |
| H5N5-14            | A/Mute swan/Hungary/5879/2017                     | Mute swan           | 2017-02-14      | Hungary             |                                                                                                    | EPI_ISL_256462    |
| H5N5-15            | A/Chicken/Croatia/104/2017                        | Chicken             | 2017-03-07      | Croatia             | Croatian Veterinary Institute                                                                      | EPI_ISL_261332    |
| H5N5-16            | A/Turkey/Germany-SH/R425/2017                     | Turkey              | 2017-01-22      | Germany             | Friedrich-Loeffler-Institut                                                                        | EPI_ISL_243049    |
| H5N5-17            | A/Cormorant/Germany-SH/R896/2017                  | Cormorant           | 2017-01-30      | Germany             | Friedrich-Loeffler-Institut                                                                        | EPI_ISL_260059    |
| H5N5-18            | A/Egret/Germany-SH/R1459/2017                     | Egret               | 2017-02-14      | Germany             | Friedrich-Loeffler-Institut                                                                        | EPI_ISL_259525    |
| H5N5-19            | A/Go/NL-Utrecht/17006881-001/2017                 | Goose               | 2017-05-22      | Netherlands         | Wageningen Bioveterinary Research                                                                  | EPI_ISL_288411    |
| H5N5-20            | A/Mute swan/Czech Republic/2031-17/2017           | Mute swan           | 2017-02-09      | Czech Republic      | State Veterinary Institute Prague                                                                  | EPI_ISL_250920    |
| H5N5-21            | A/Spot-billed pelican/Czech Republic/2270-17/2017 | Spot-billed pelican | 2017-02-14      | Czech Republic      | State Veterinary Institute Prague                                                                  | EPI_ISL_268981    |
