# Supplementary material for: Spread of Highly Pathogenic Avian Influenza (HPAI) H5N5 Viruses in Europe in 2016–2017 Appears Related to the Timing of Reassortment Events
Source: MDPI journal article supplement (doi:10.3390/v11060501), 2019-05-31
Supplement: s1 [file s1]

**Table S4. Viruses used for *in vitro* experiments.** List of highly pathogenic avian influenza (HPAI) H5N8 and H5N5 viruses used for *in vitro* experiments, representing genotypes H5N5-GT1, H5N5-GT2, H5N5-GT3 and European H5N8 NL-Zeewolde-like virus. The GISAID isolate ID numbers refer to the whole genome sequences that were submitted to the GISAID's EpiFlu™ Database (<http://www.gisaid.org>).

| Genotype | Isolate name                                | Bird species  | Collection date | Collection location            | GISAID isolate ID |
|----------|---------------------------------------------|---------------|-----------------|--------------------------------|-------------------|
| H5N8     | A/Dk/NL-Biddinghuizen/16014829-011-015/2016 | Domestic duck | 2016-11-25      | Biddinghuizen, The Netherlands | EPI_ISL_268629    |
| H5N5-GT1 | A/T_Dk/NL-Werkendam/16014159-001/2016       | Tufted duck   | 2016-11-14      | Werkendam, The Netherlands     | EPI_ISL_287564    |
| H5N5-GT2 | A/M_Swan/NL-Groningen/16015826-001/2016     | Mute swan     | 2016-12-13      | Groningen, The Netherlands     | EPI_ISL_287565    |
| H5N5-GT3 | A/Go/NL-Utrecht/17006881-001/2017           | Goose         | 2017-05-22      | Utrecht, The Netherlands       | EPI_ISL_288411    |
