# Supplementary material for: Spread of Highly Pathogenic Avian Influenza (HPAI) H5N5 Viruses in Europe in 2016–2017 Appears Related to the Timing of Reassortment Events
Source: MDPI journal article supplement (doi:10.3390/v11060501), 2019-05-31
Supplement: s1 [file s1]

**Table S3. List of H5N8 cluster representatives.** Sequences of highly pathogenic avian influenza (HPAI) H5N8 viruses used as cluster representatives in this study as listed in the GISAID's EpiFlu™ Database. The cluster representatives were selected by clustering the nucleotide sequences of around 675 HPAI H5N8 2016-2017 viruses available in the GISAID's EpiFlu Database on 10 May 2019. A nucleotide sequence identity threshold value of 1.5% was used to define clusters. We gratefully acknowledge the authors, originating and submitting laboratories of the sequences from GISAID's EpiFlu™ Database on which this research is based. All submitters of data may be contacted directly via the GISAID website (<http://www.gisaid.org>).

| Gene segment | Cluster representative                       | GISAID isolate ID | No. sequences in cluster |
|--------------|----------------------------------------------|-------------------|--------------------------|
| PB1          | A/Brown-headed_Gull/Qinghai/ZTO1-B/2016      | EPI_ISL_224742    | 436                      |
|              | A/Goose/Hungary/65817/2016                   | EPI_ISL_255174    | 18                       |
| PB2          | A/Brown-headed_Gull/Qinghai/ZTO1-B/2016      | EPI_ISL_224742    | 97                       |
|              | A/T_Dk/NL-Zeewolde/16013976-001/2016         | EPI_ISL_268674    | 261                      |
|              | A/mute_swan/Hungary/51049/2016               | EPI_ISL_237730    | 103                      |
| PA           | A/Brown-headed_Gull/Qinghai/ZTO1-B/2016      | EPI_ISL_224742    | 174                      |
|              | A/T_Dk/NL-Monnickendam/16013865-006-008/2016 | EPI_ISL_268669    | 15                       |
|              | A/T_Dk/NL-Zeewolde/16013976-001/2016         | EPI_ISL_268674    | 241                      |
|              | A/domestic_duck/Siberia/50K/2016             | EPI_ISL_240678    | 62                       |
|              | A/chicken/Taiwan/x37/2016                    | EPI_ISL_256398    | 2                        |
| NP           | A/Brown-headed_Gull/Qinghai/ZTO1-B/2016      | EPI_ISL_224742    | 62                       |
|              | A/T_Dk/NL-Zeewolde/16013976-001/2016         | EPI_ISL_268674    | 260                      |
|              | A/duck/India/10CA01/2016                     | EPI_ISL_237553    | 1                        |
|              | A/domestic_duck/Siberia/50K/2016             | EPI_ISL_240678    | 69                       |
|              | A/mute_swan/Hungary/51049/2016               | EPI_ISL_237730    | 101                      |
|              | A/chicken/Astrakhan/3131/2016                | EPI_ISL_240110    | 1                        |
| HA           | A/Brown-headed_Gull/Qinghai/ZTO1-B/2016      | EPI_ISL_224742    | 675                      |
| MP           | A/Brown-headed_Gull/Qinghai/ZTO1-B/2016      | EPI_ISL_224742    | 490                      |
| NS           | A/Brown-headed_Gull/Qinghai/ZTO1-B/2016      | EPI_ISL_224742    | 480                      |

PB2, polymerase basic protein 2; PB1, polymerase basic protein 1; PA, polymerase acidic protein; HA, hemagglutinin; NP, nucleoprotein; MP, matrix protein; NS, nonstructural protein
