# Supplementary material for: Spread of Highly Pathogenic Avian Influenza (HPAI) H5N5 Viruses in Europe in 2016–2017 Appears Related to the Timing of Reassortment Events
Source: Viruses. 2019 May 31;11(6):501. doi: 10.3390/v11060501 (PMC6631432; doi:10.3390/v11060501)
Supplement: Supplementary file 1 [file viruses-11-00501-s001.zip]

Archive with 8 entries (8 files):
- FigS1_revised.pdf
- FigS2_revised.pdf
- FigS3_revised.pdf
- Table S1_revised.pdf
- Table S2_revised.pdf
- Table S3_revised.pdf
- Table S4_revised.pdf
- Table S5_revised.pdf
